# Supplementary material for: Palladium-catalyzed synthesis of 2-alkenyl-3-arylindoles via a dual α-arylation strategy: formal synthesis of the antilipemic drug fluvastatin
Source: Royal Society of Chemistry journal article supplement (doi:10.1039/c5ob01632k), 2015-01-01

## **Supporting Information**

### **Palladium-catalyzed Synthesis of 2-Alkenyl-3-Arylindoles via Dual $\alpha$ -Arylation Strategy: Formal Synthesis of the Antilipemic Drug Fluvastatin**

Ajit Prabhakar Kale, Gangam Srikanth Kumar and Manmohan Kapur \*

*Department of Chemistry, Indian Institute of Science Education and Research Bhopal, Bhopal By-Pass Road, Bhopal-462066, INDIA*

*E-mail: [mk@iiserb.ac.in](mailto:mk@iiserb.ac.in)*

$^1\text{H}$ - and  $^{13}\text{C}$ -NMR & DEPT-135 spectra of new compounds

Pg 2-51

GS-2014021-029P/1H/CDCI3/05-12-2014

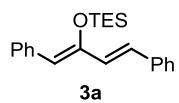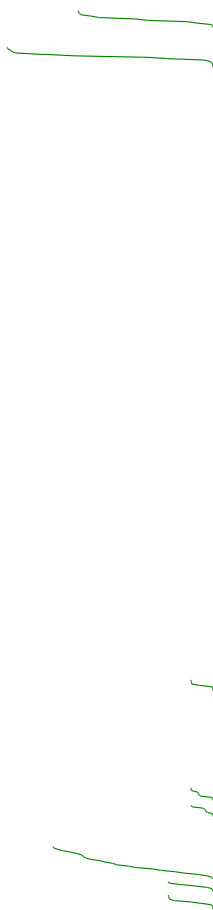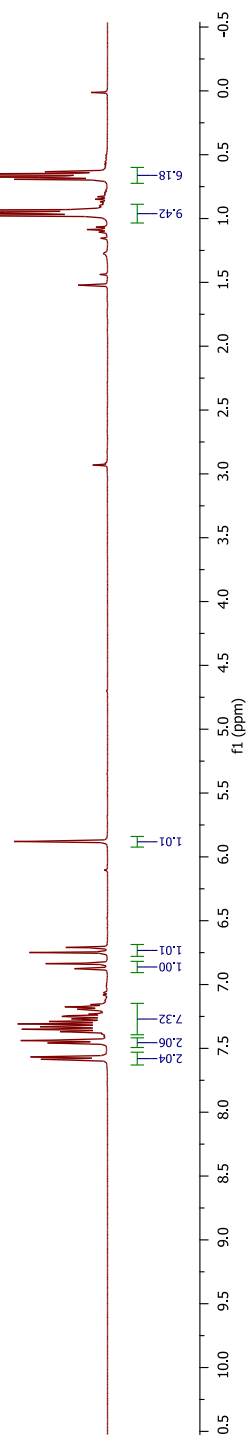

150.36  
136.95  
136.53  
128.89  
128.05  
127.64  
126.61  
126.31  
114.91

6.78  
5.47

GS-2014021-029P/13C/CDCI3/05-12-2014

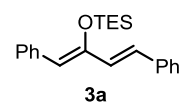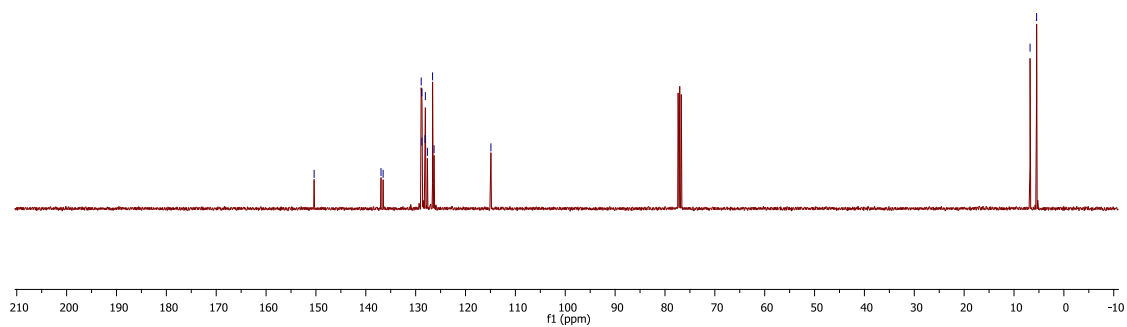

GS-2014021-029P/DEPT135/CDCI3/05-12-2014

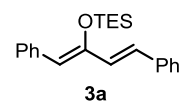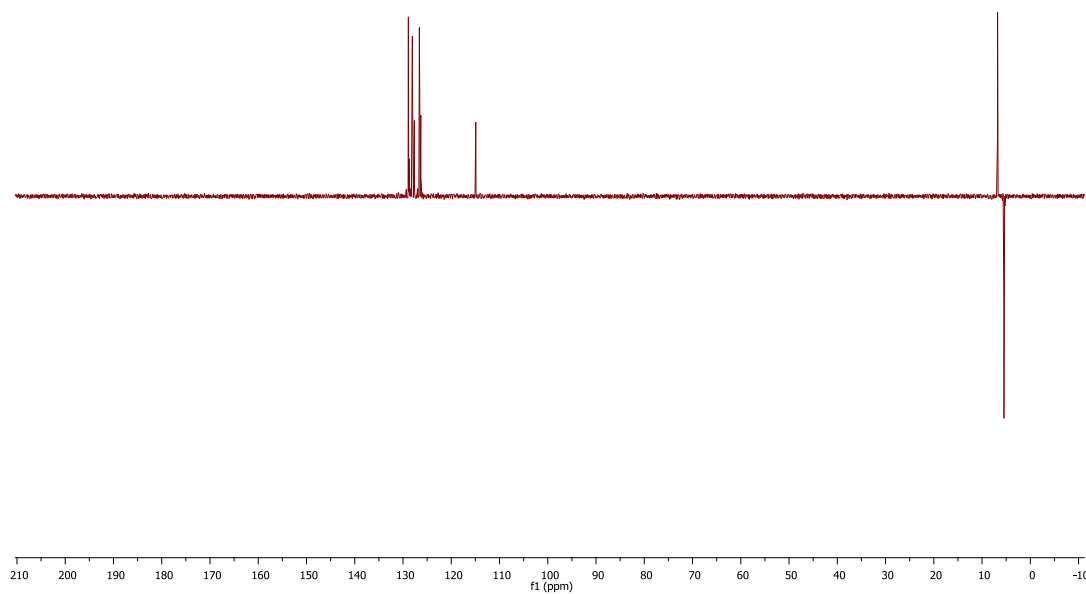

AK-2014024-026/1H/CDCI3/11-12-2014

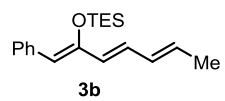

11.16 9.39 6.39 3.13

2.09 2.28 1.03 1.10 1.16 1.02 1.12 1.00

10.5 10.0 9.5 9.0 8.5 8.0 7.5 7.0 6.5 6.0 5.5 5.0 4.5 4.0 3.5 3.0 2.5 2.0 1.5 1.0 0.5 0.0 -0.5

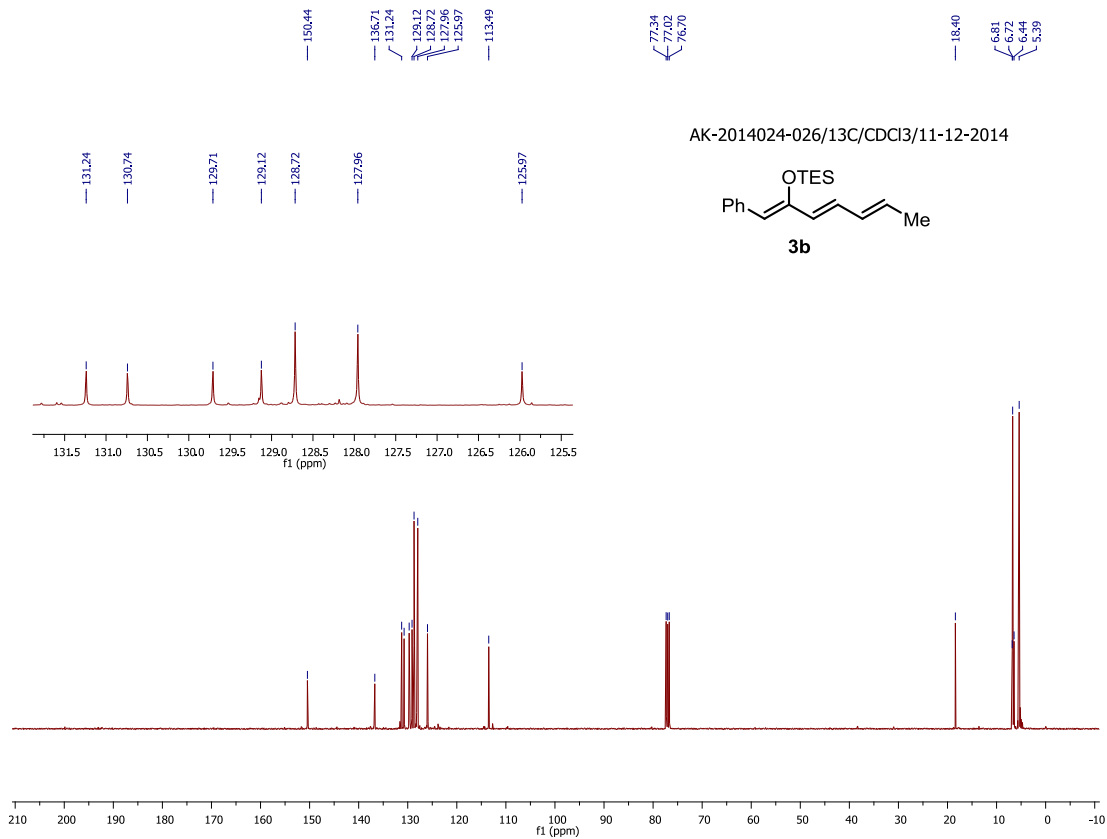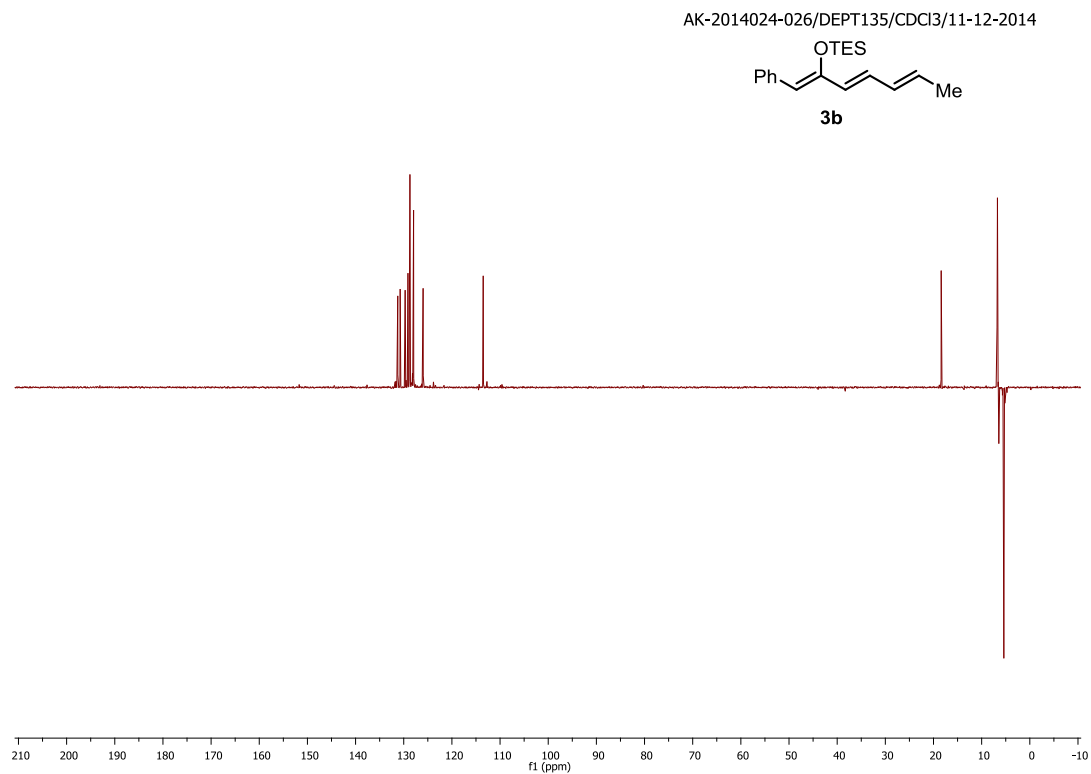

GS-2014010-091/1H/CDC13/27-12-2014

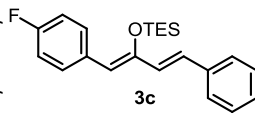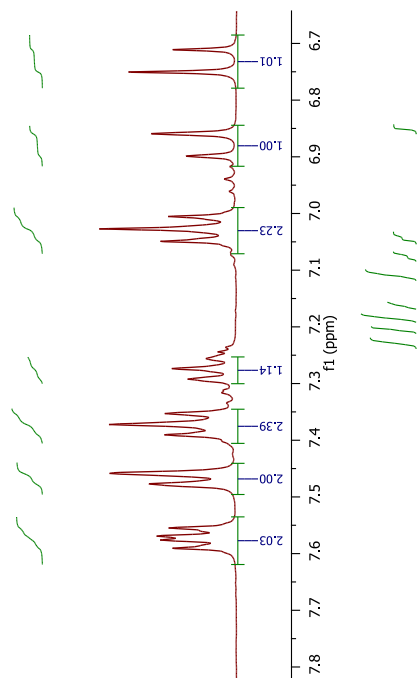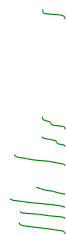

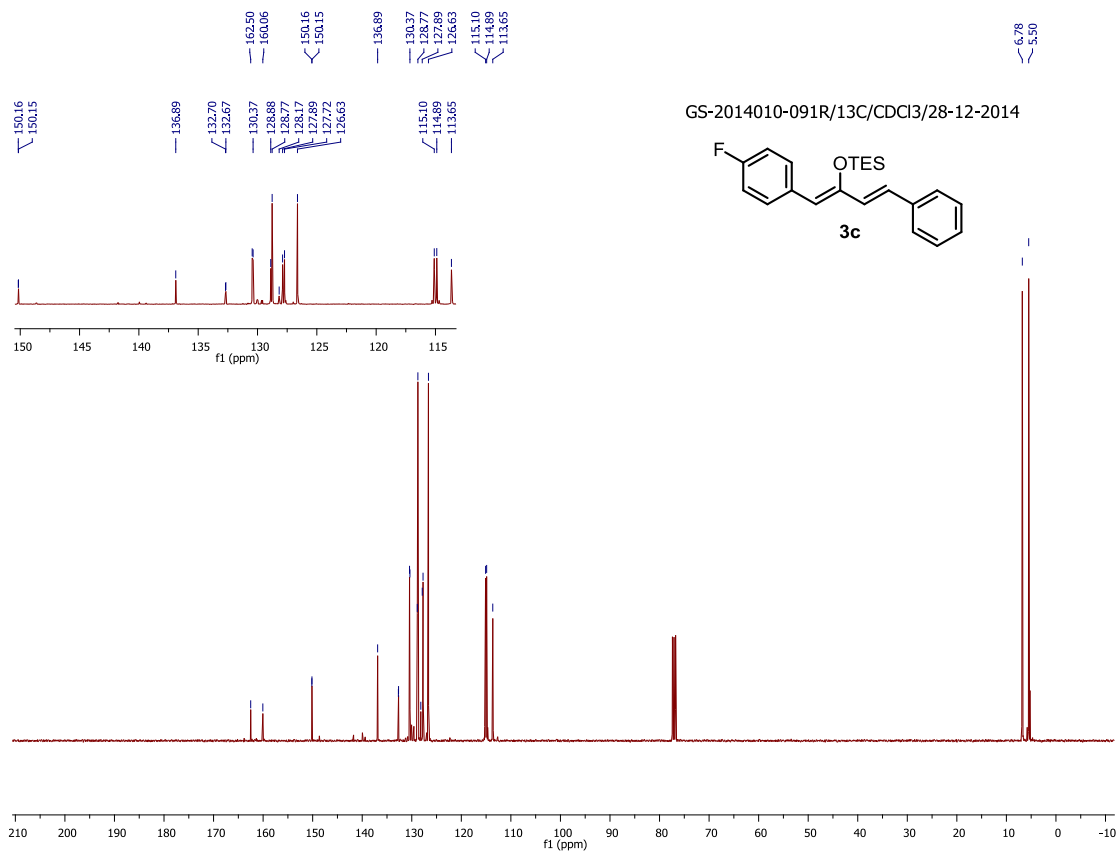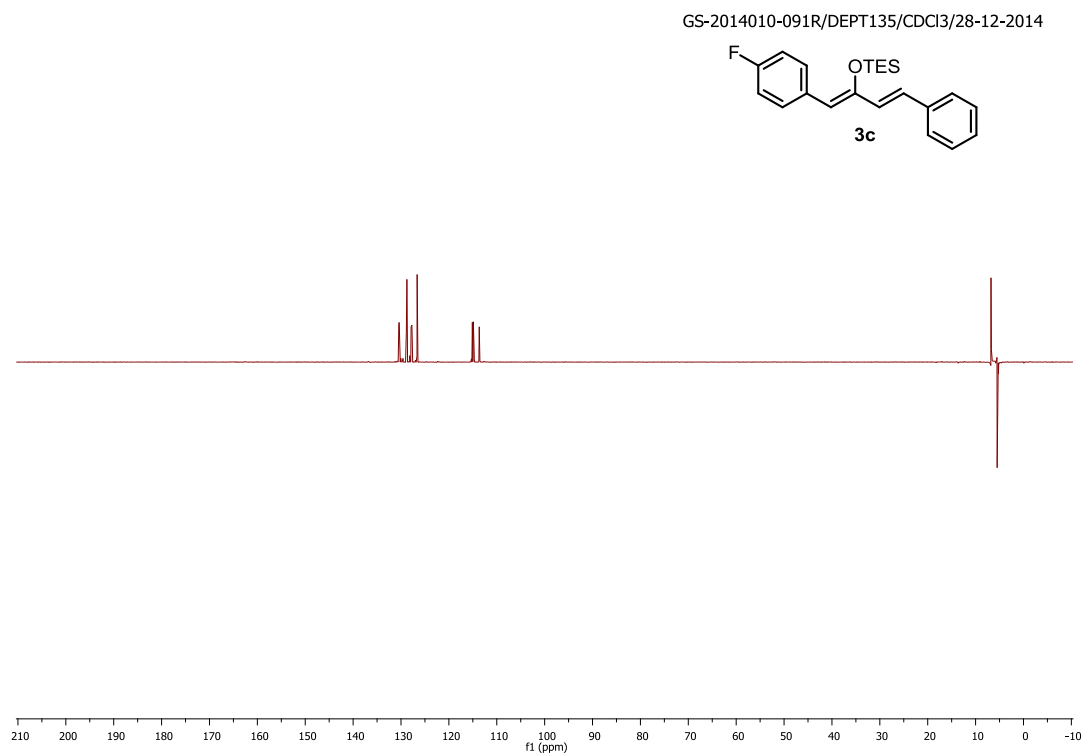

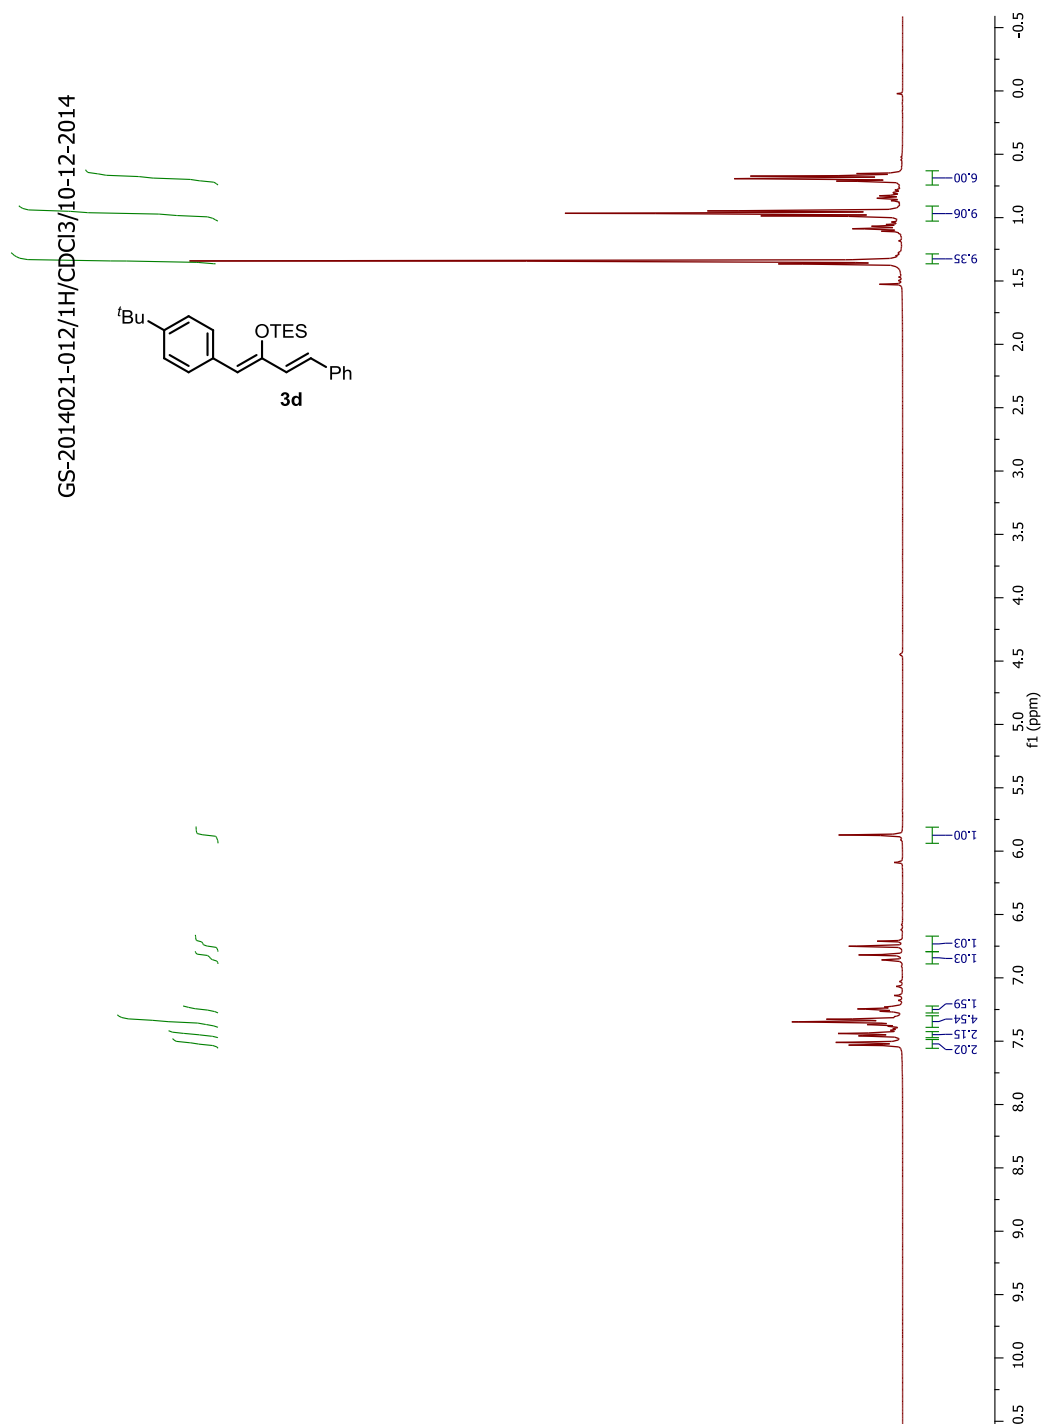



149.89  
146.37  
137.07  
135.63  
128.59  
127.52  
126.56  
124.93  
114.92

34.58  
31.35

6.82  
5.50

GS-2014021-012/<sup>13</sup>C/CDCl<sub>3</sub>/11-12-2014

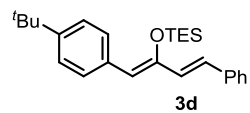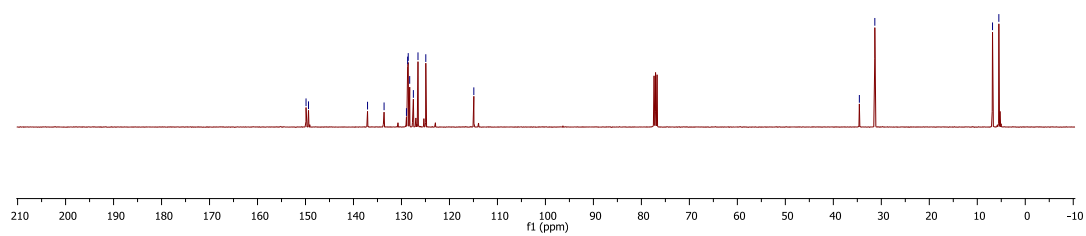

GS-2014021-012/DEPT135/CDCl<sub>3</sub>/11-12-2014

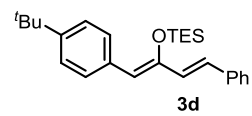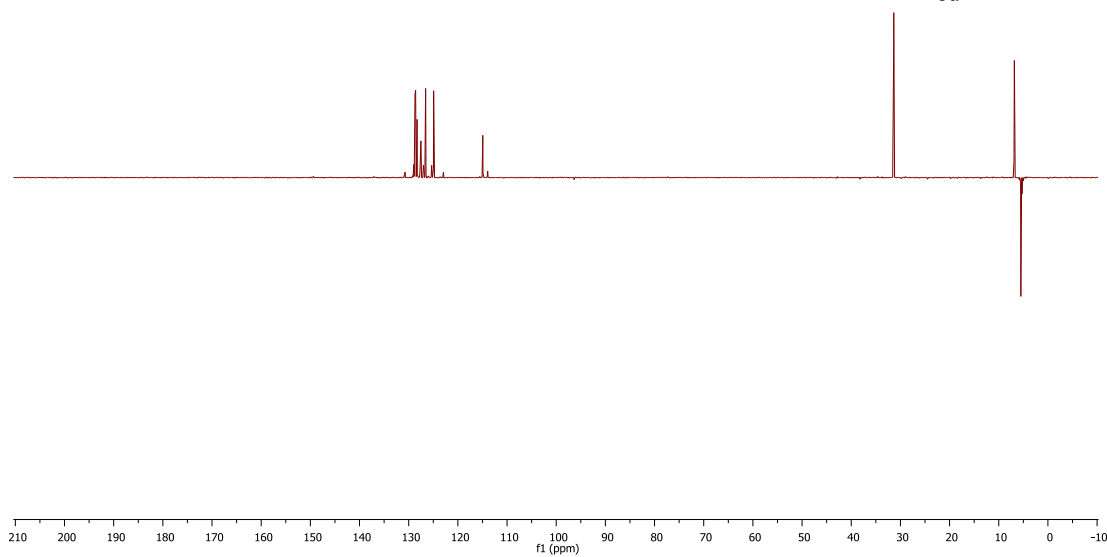

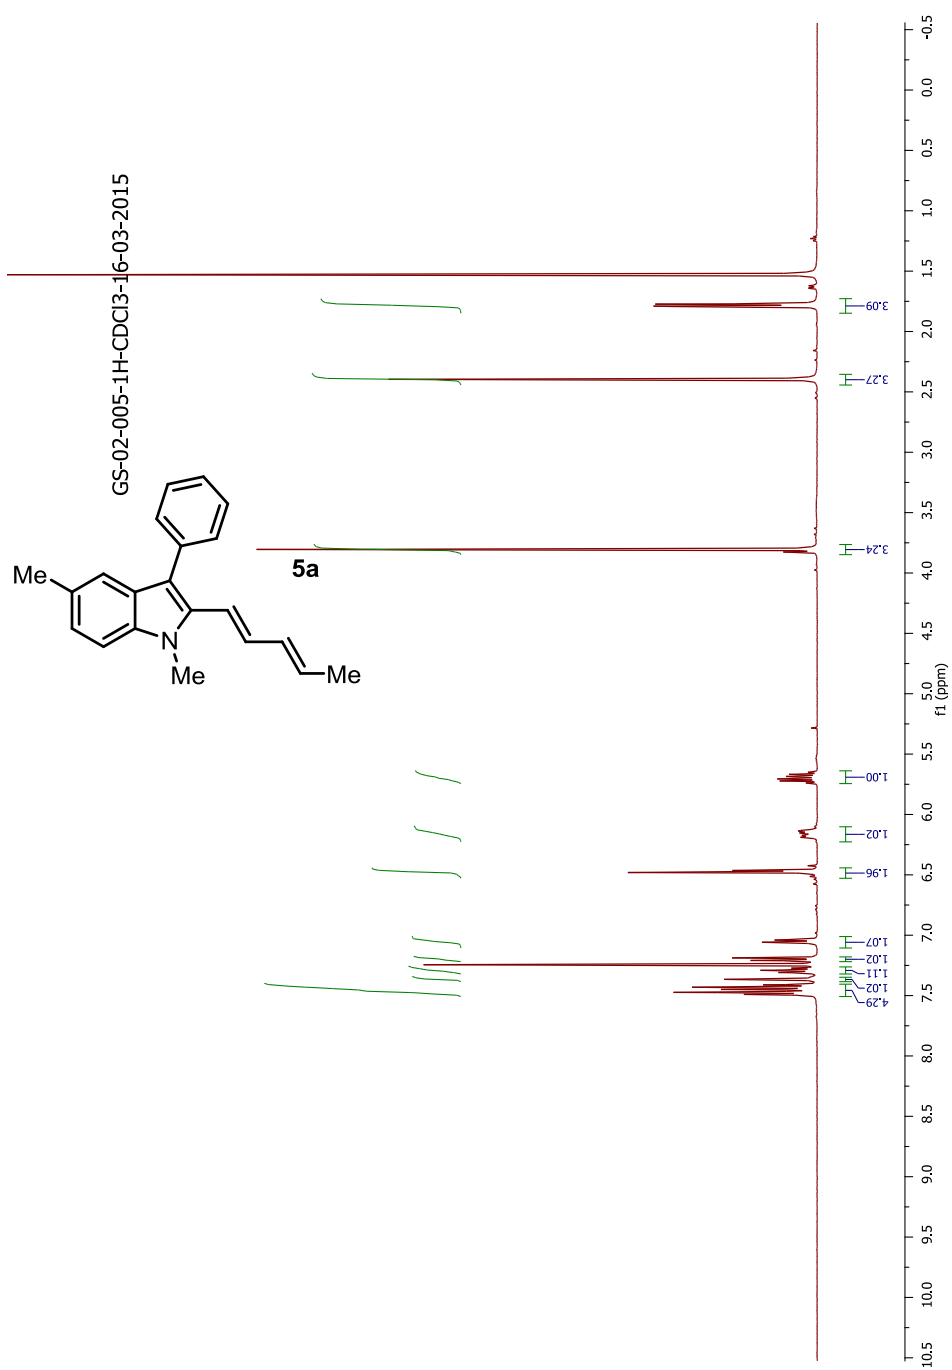

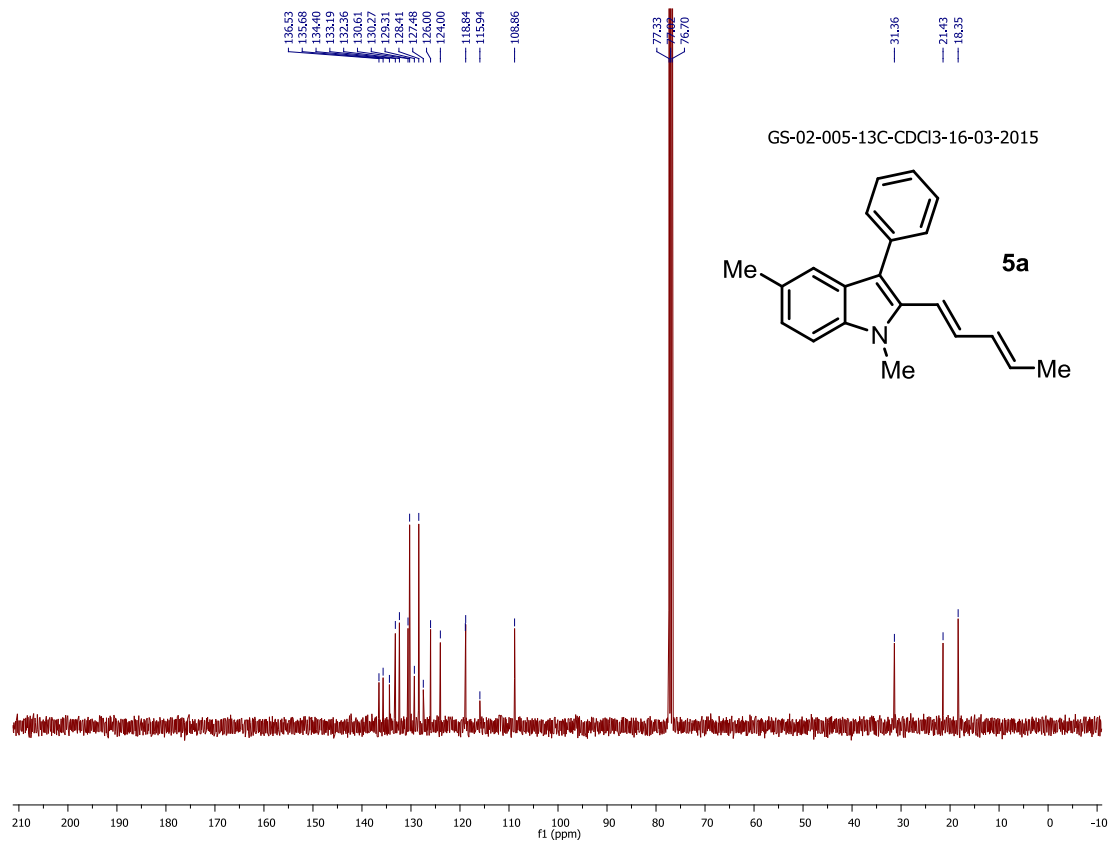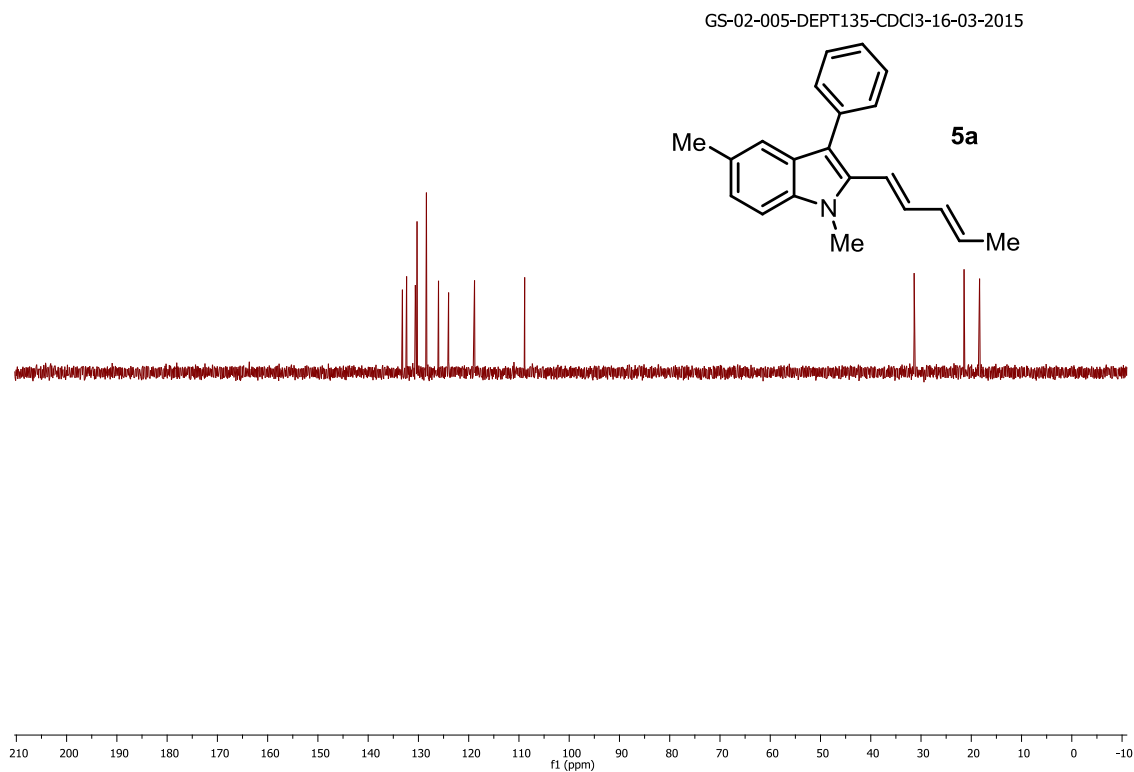

GS-2014021-040/1H/CDCl3/04-12-2014

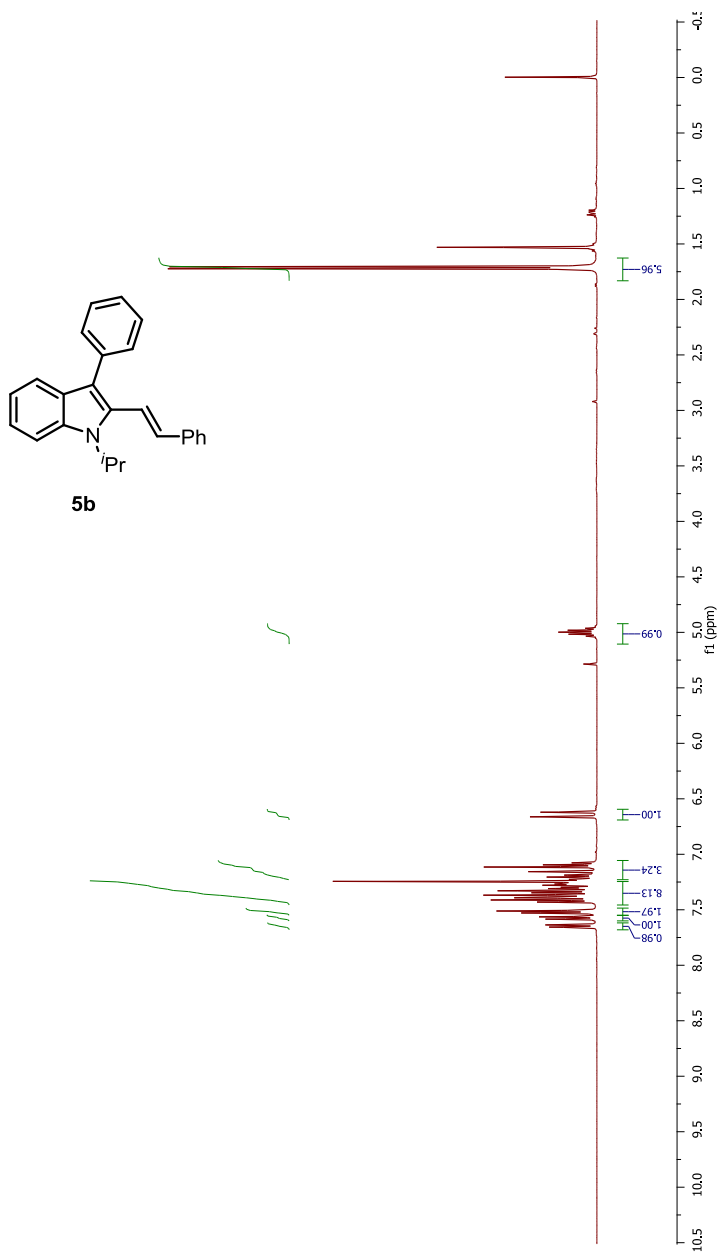

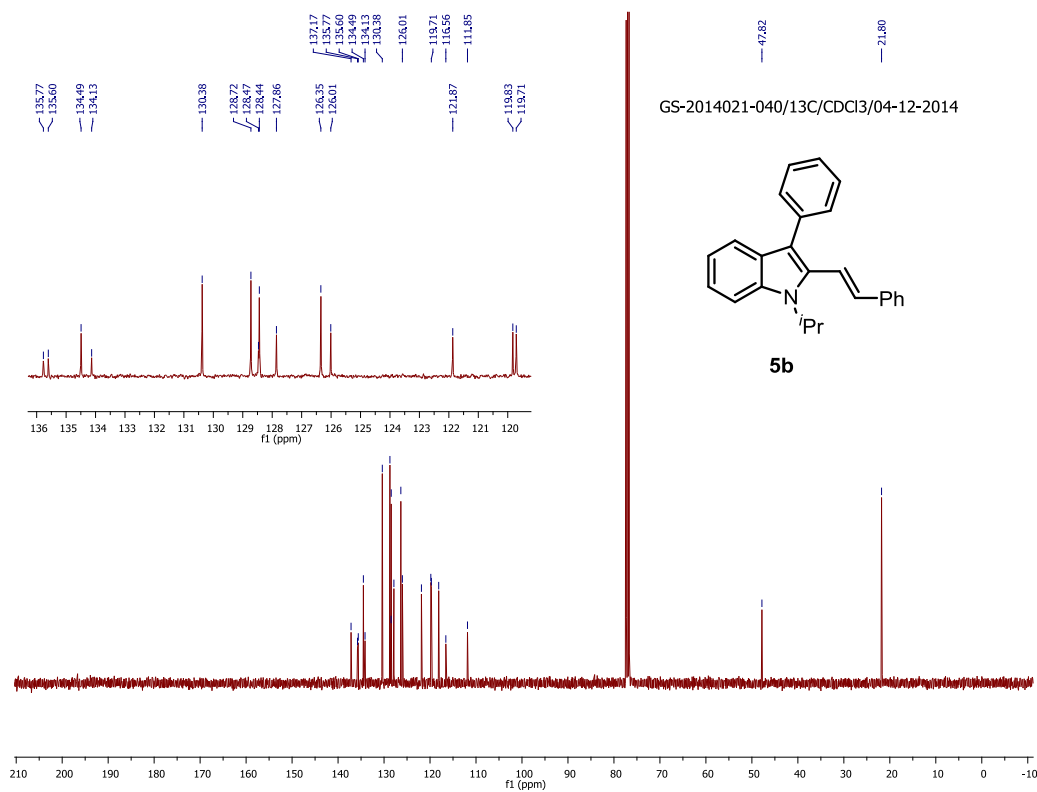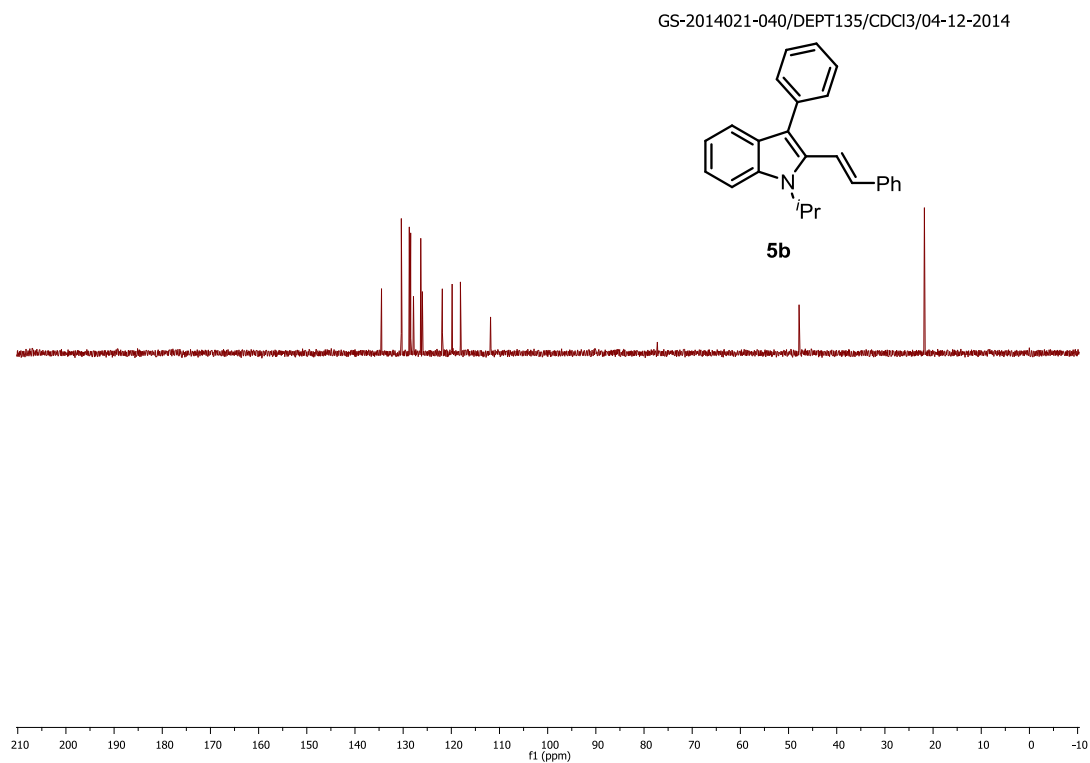

GS-2014021-047/1H/CDC3/08-12-2014

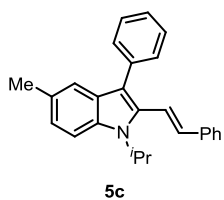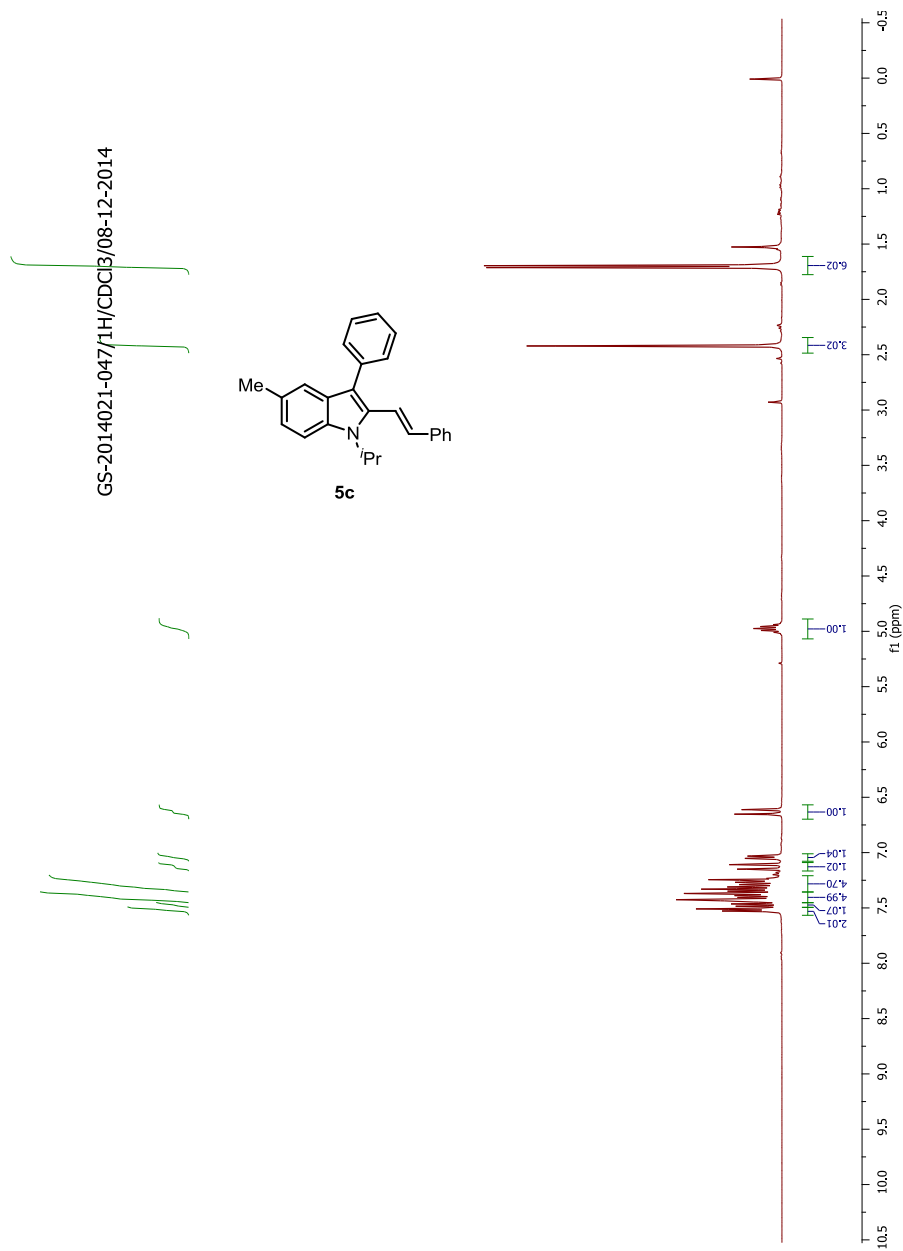

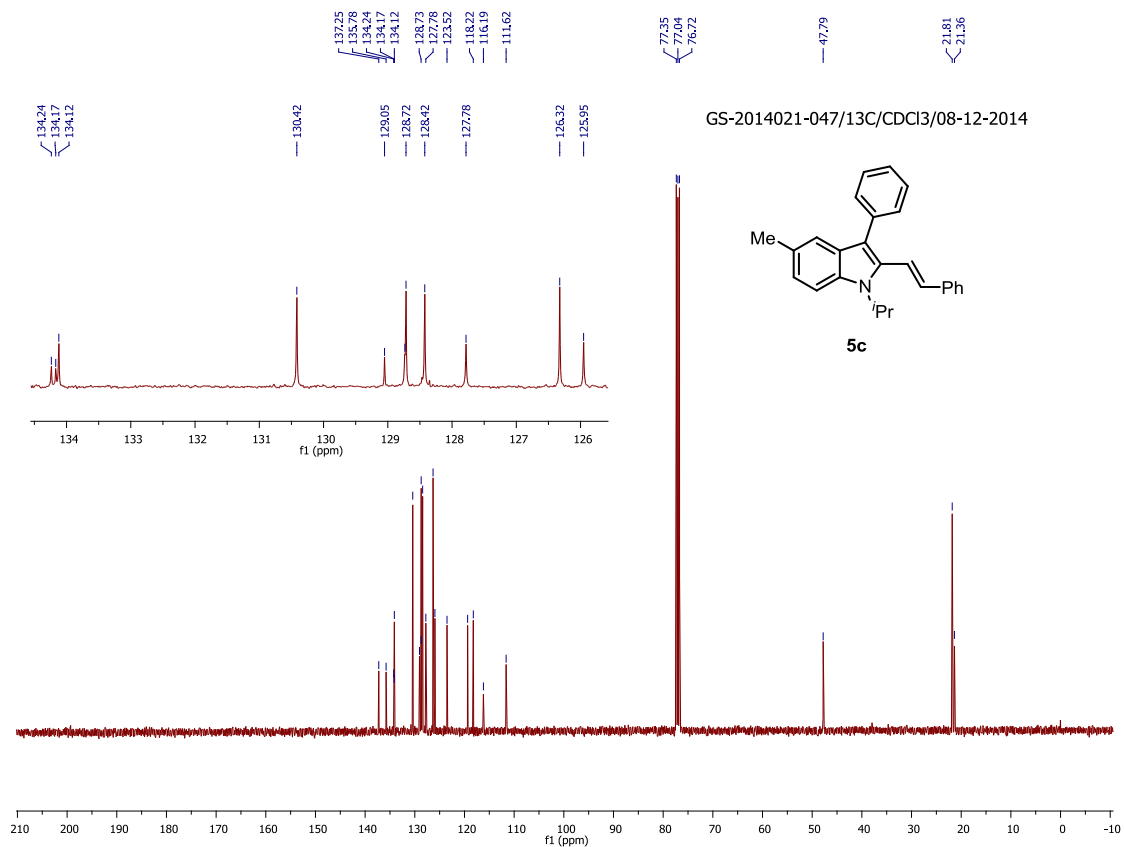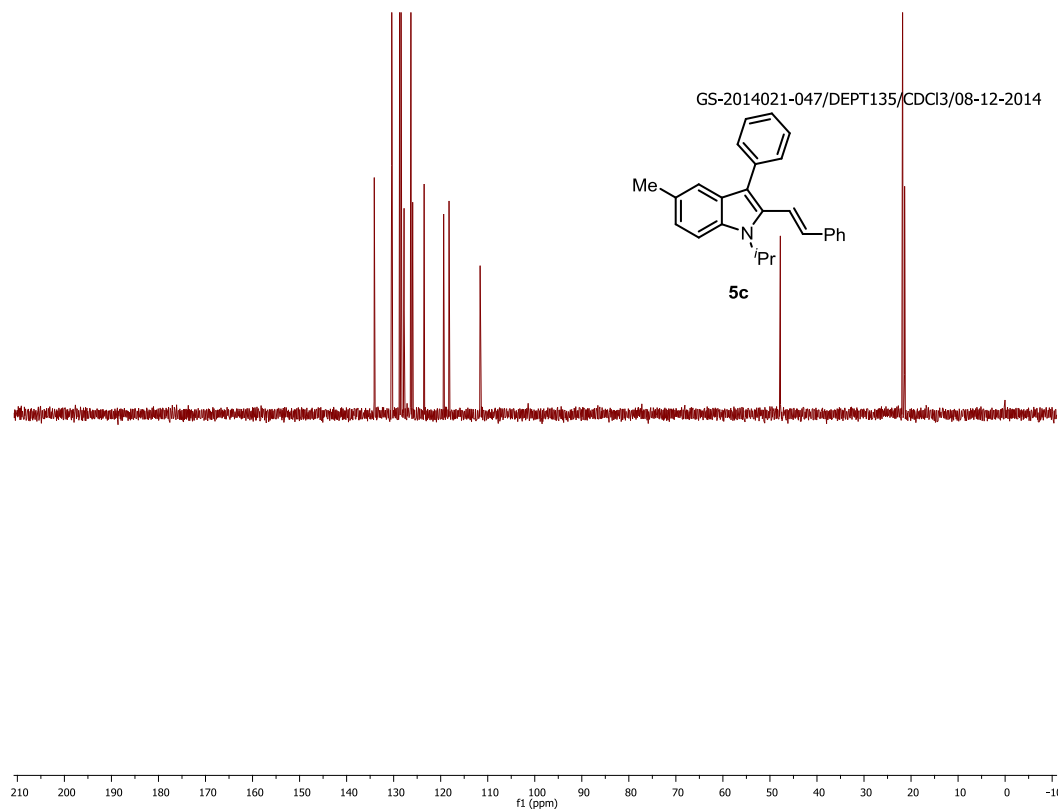

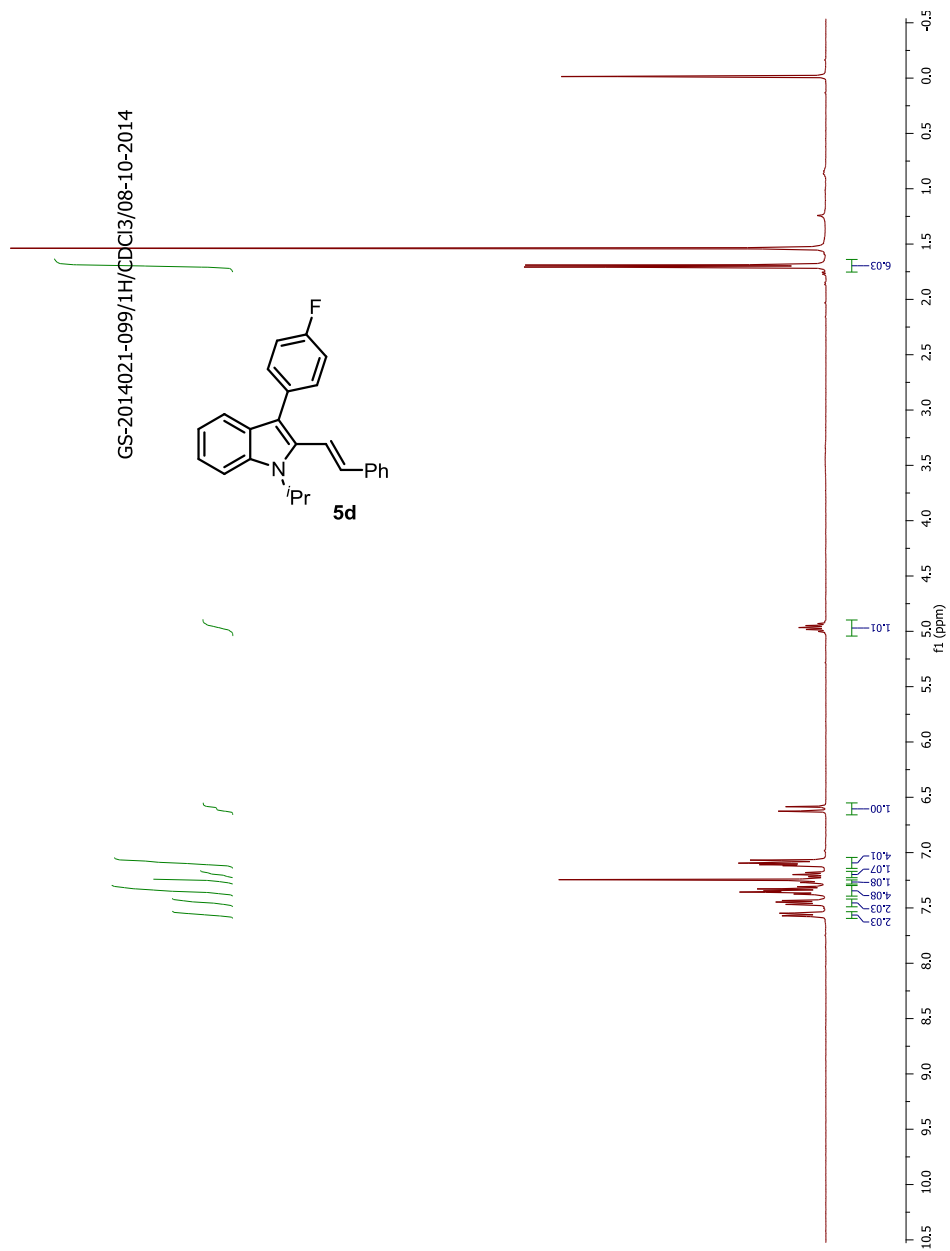



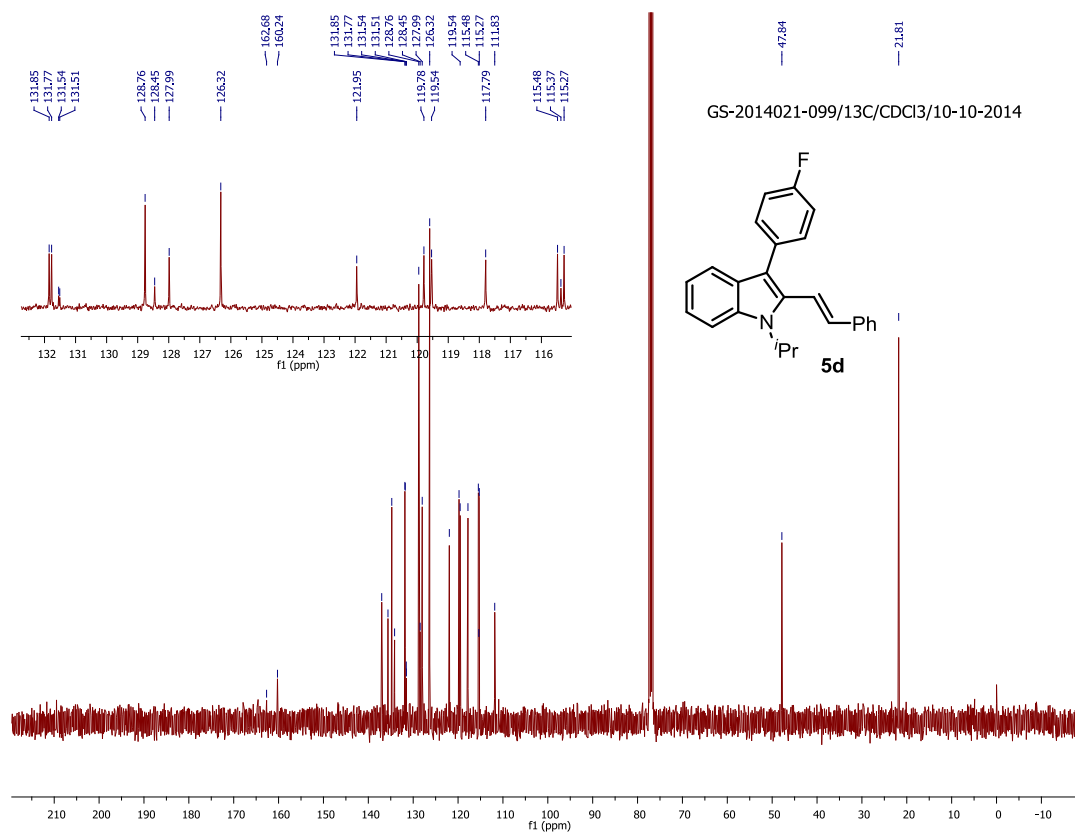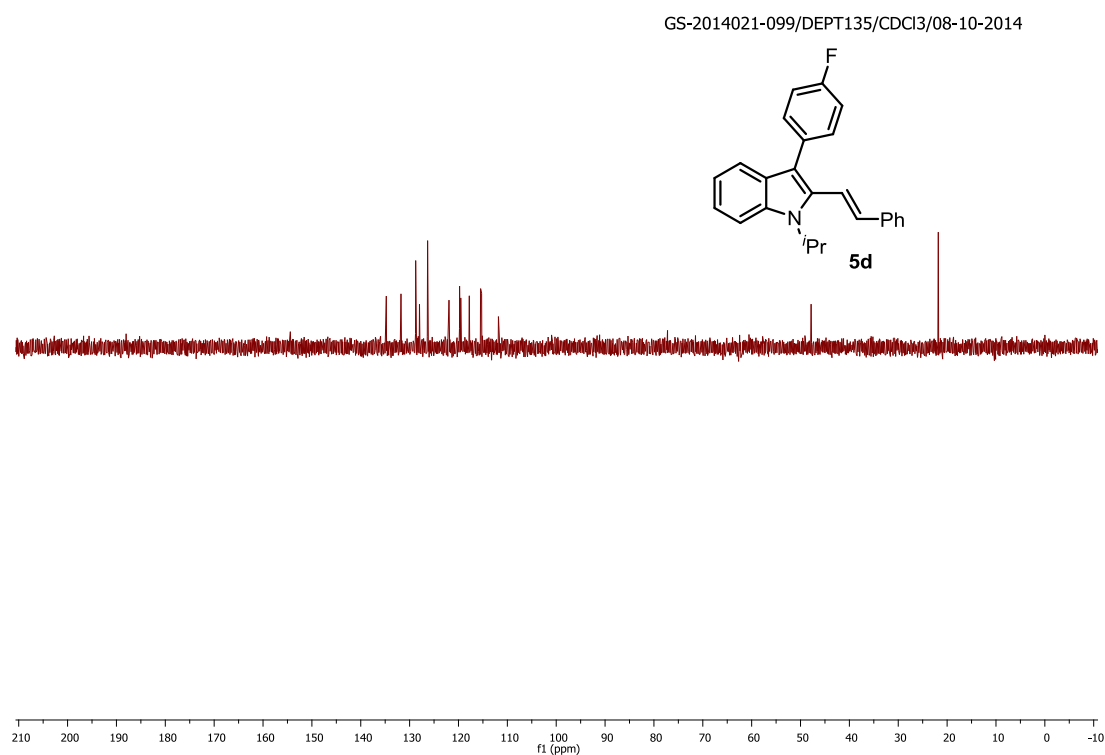

GS-2014021-053P/1H/CDC13/15-12-2014

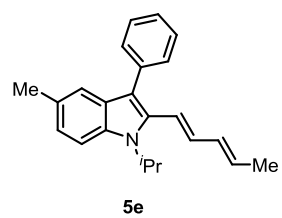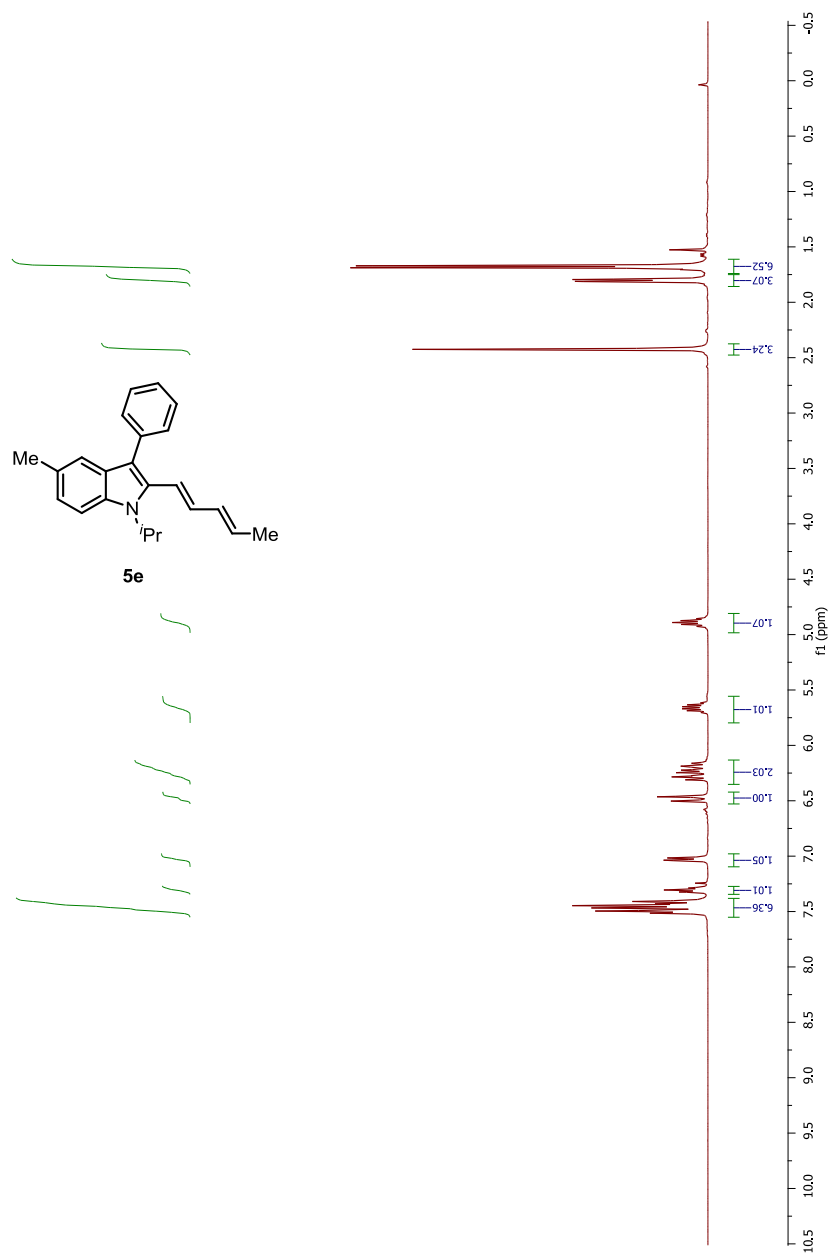

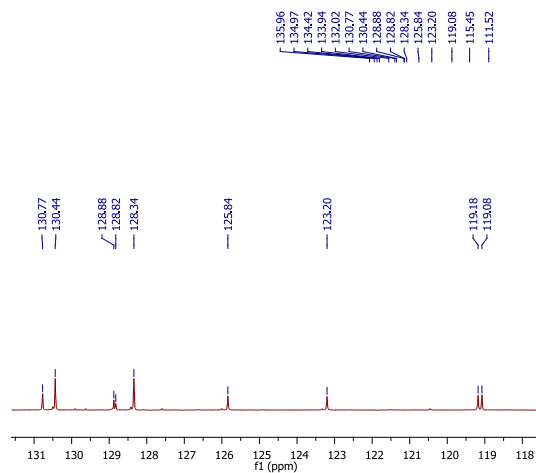

GS-2014021-053P/13C/CDCl3/15-12-2014

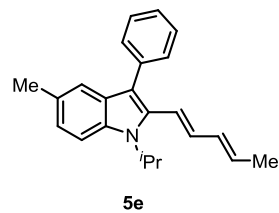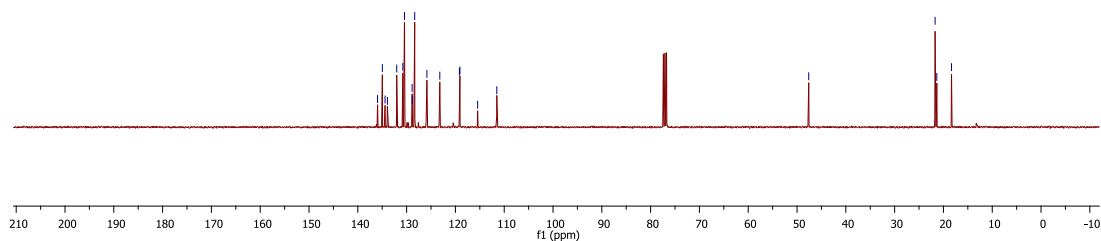

GS-2014021-053P/DEPT135/CDCl3/15-12-2014

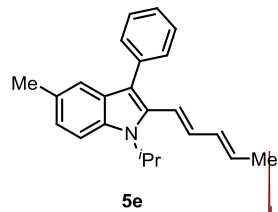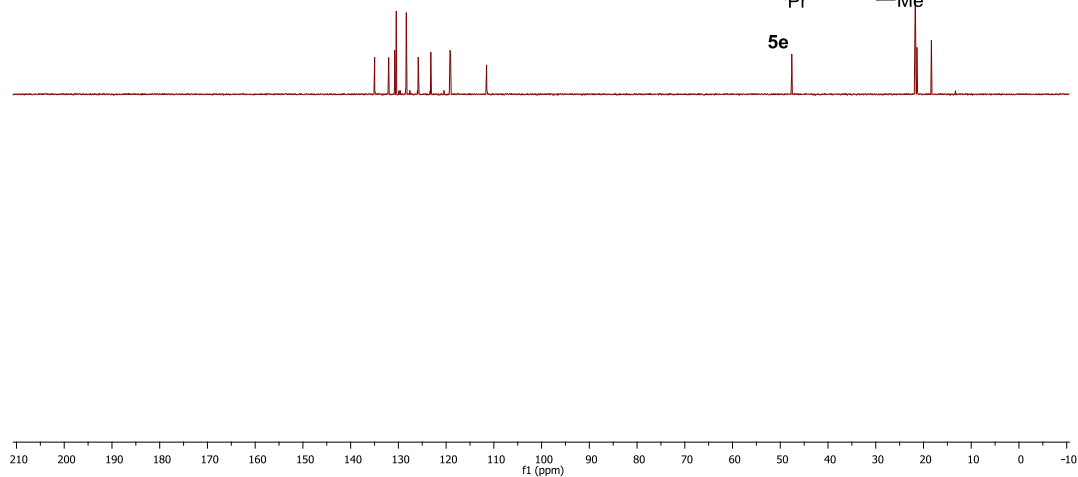

GS-2014021-52P/1H/CDCI3/15-12-2014

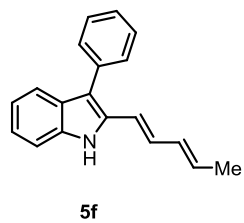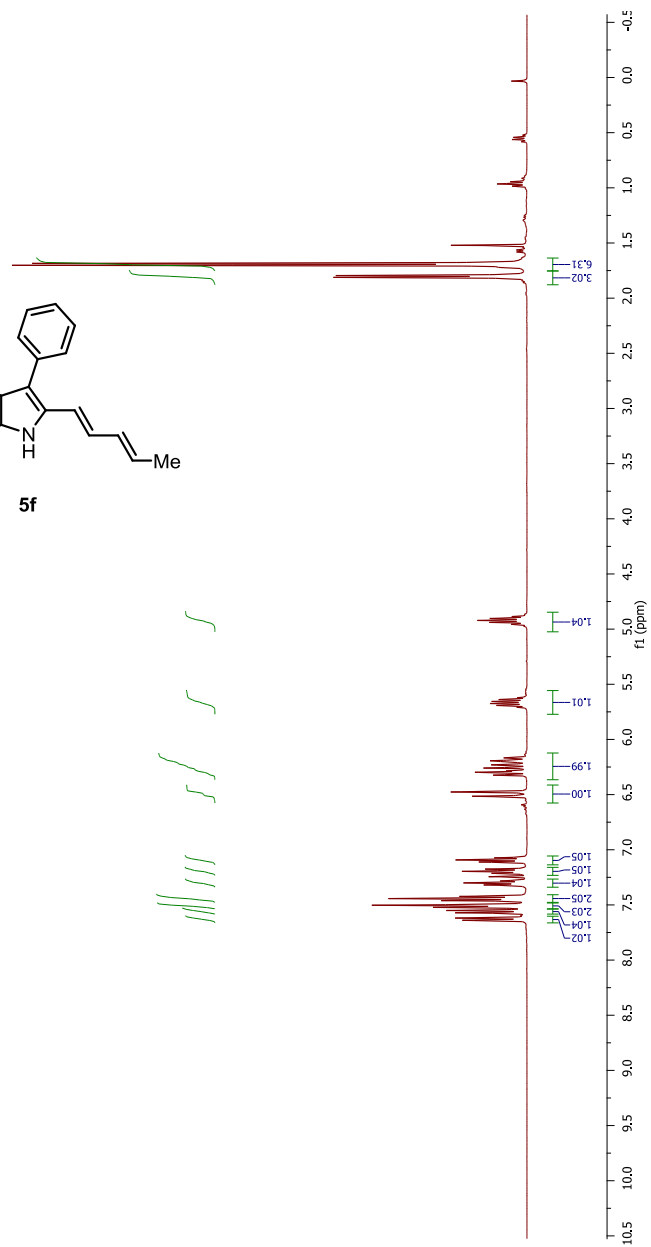

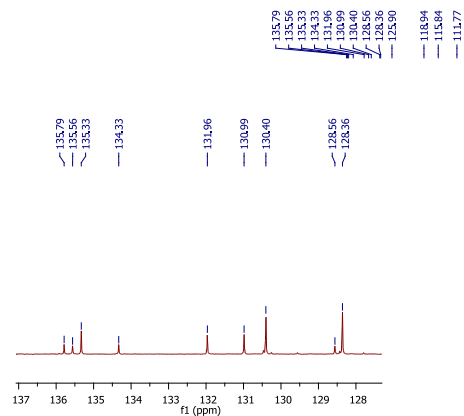

GS-2014021-52P/13C/CDCl<sub>3</sub>/15-12-2014

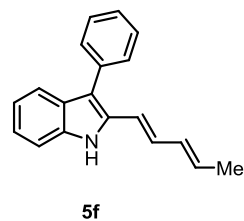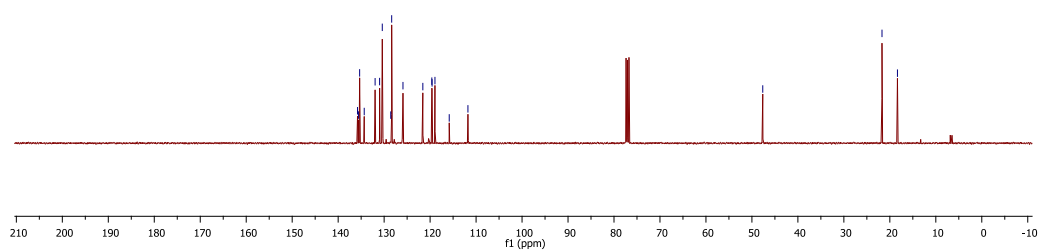

GS-2014021-52P/DEPT135/CDCl<sub>3</sub>/15-12-2014

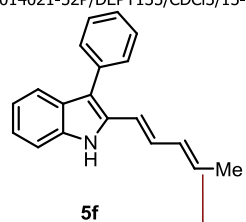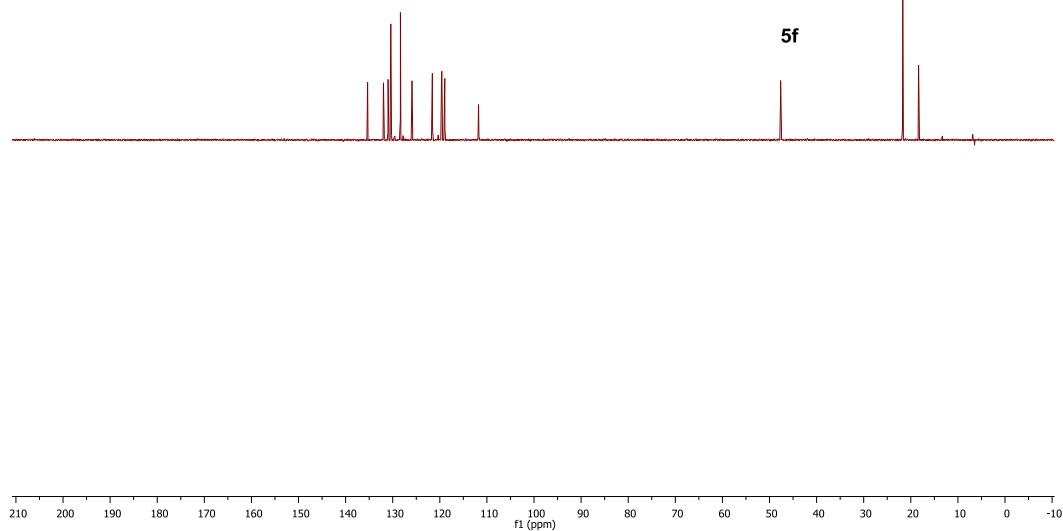

GS-02-002-1H-CDCl3-11-02-2015

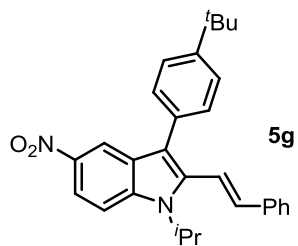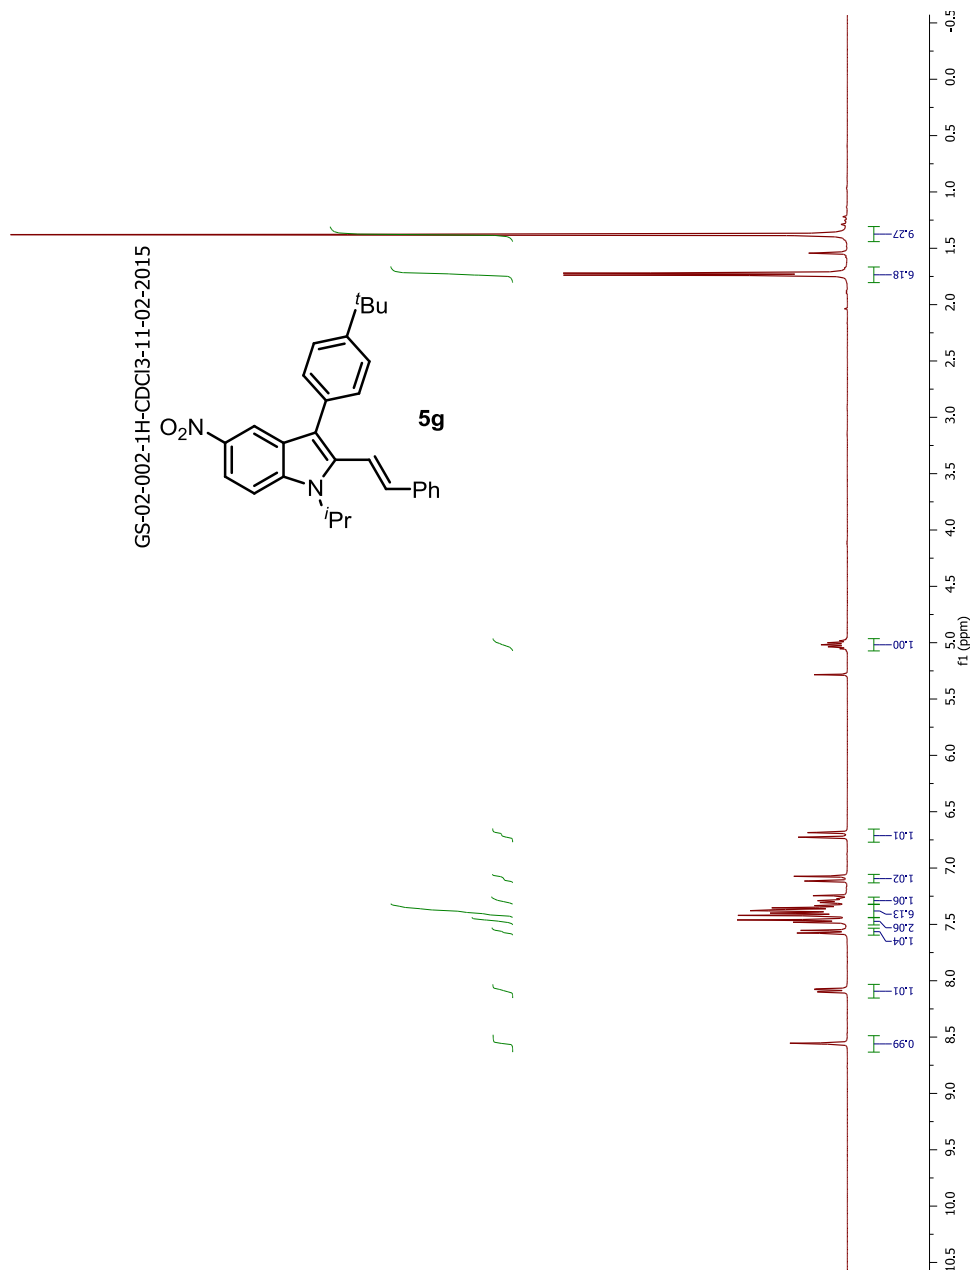

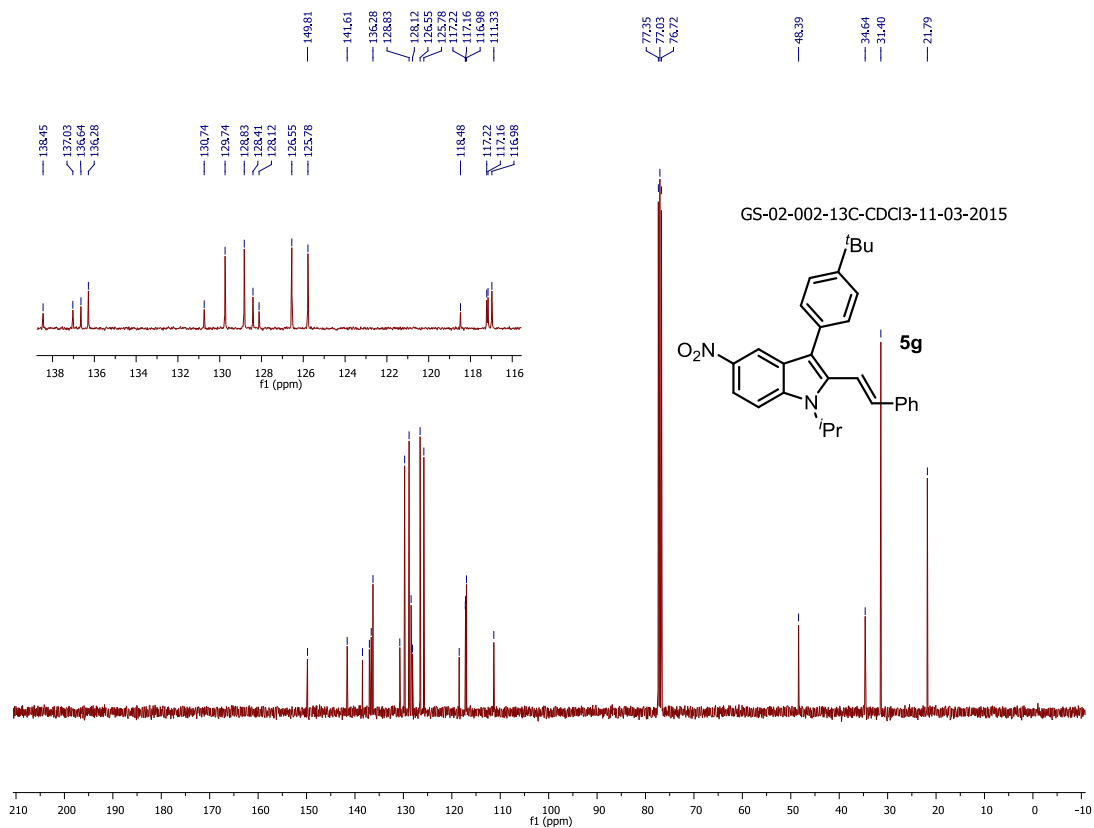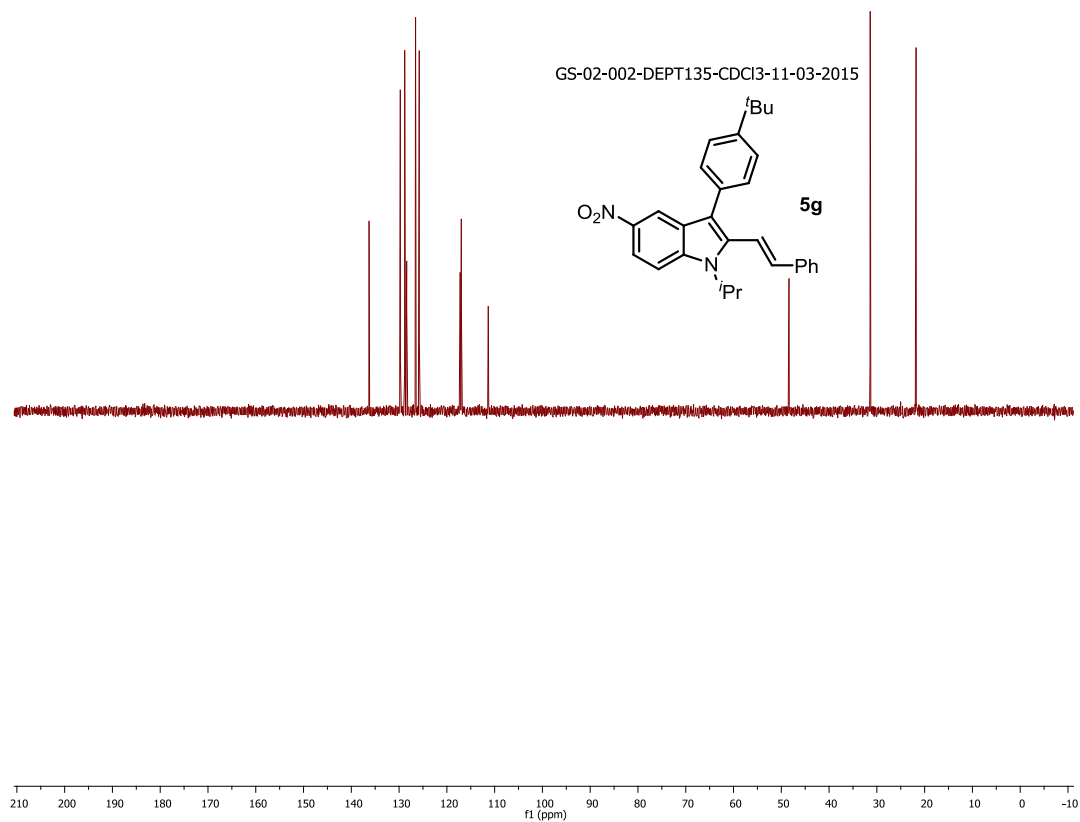

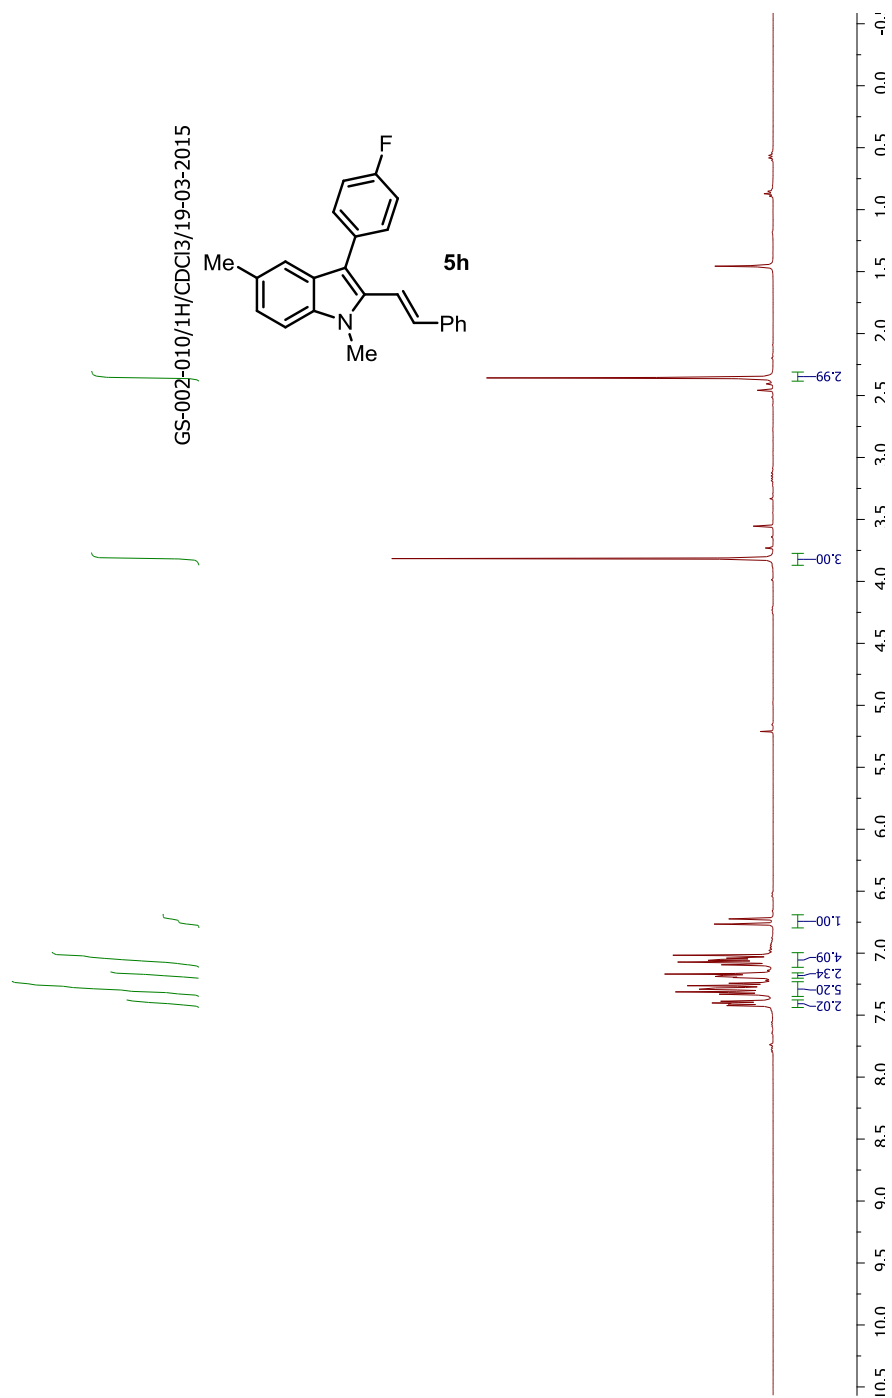



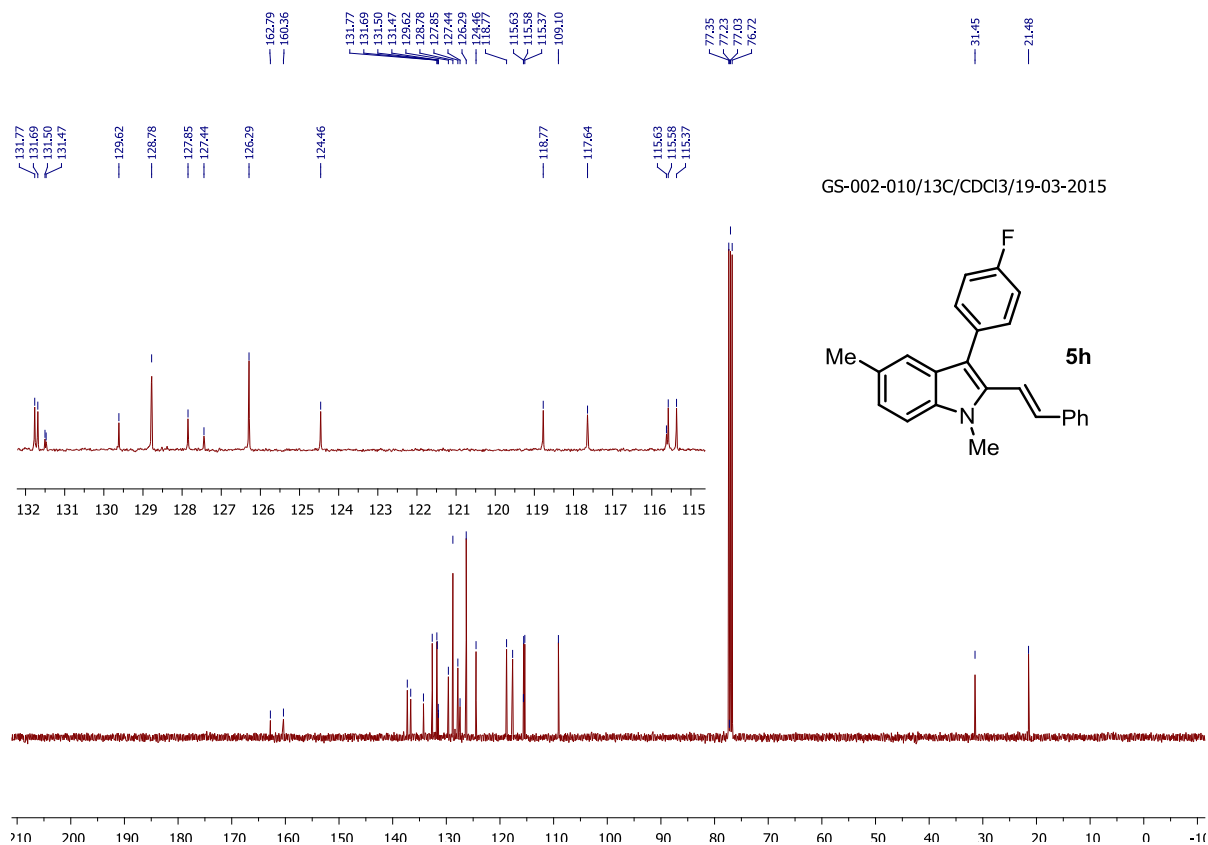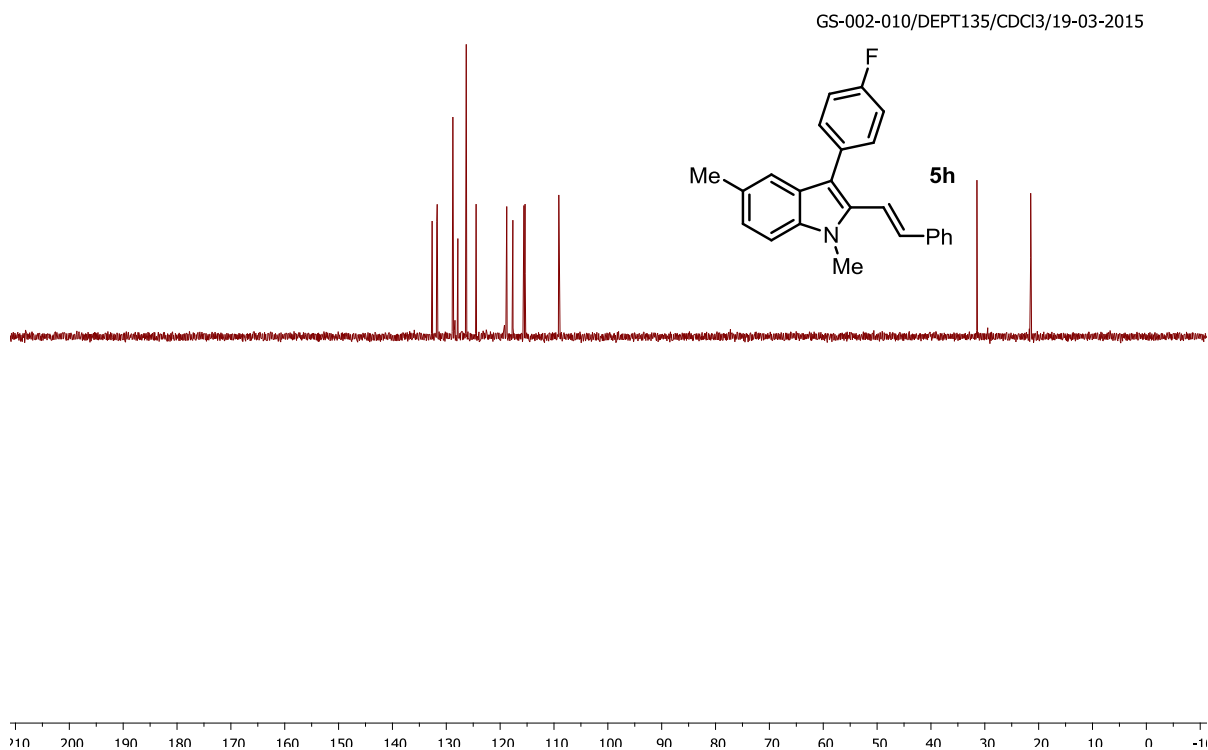

GS-02-019-1H-CDCI3-24-03-2015

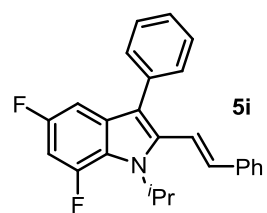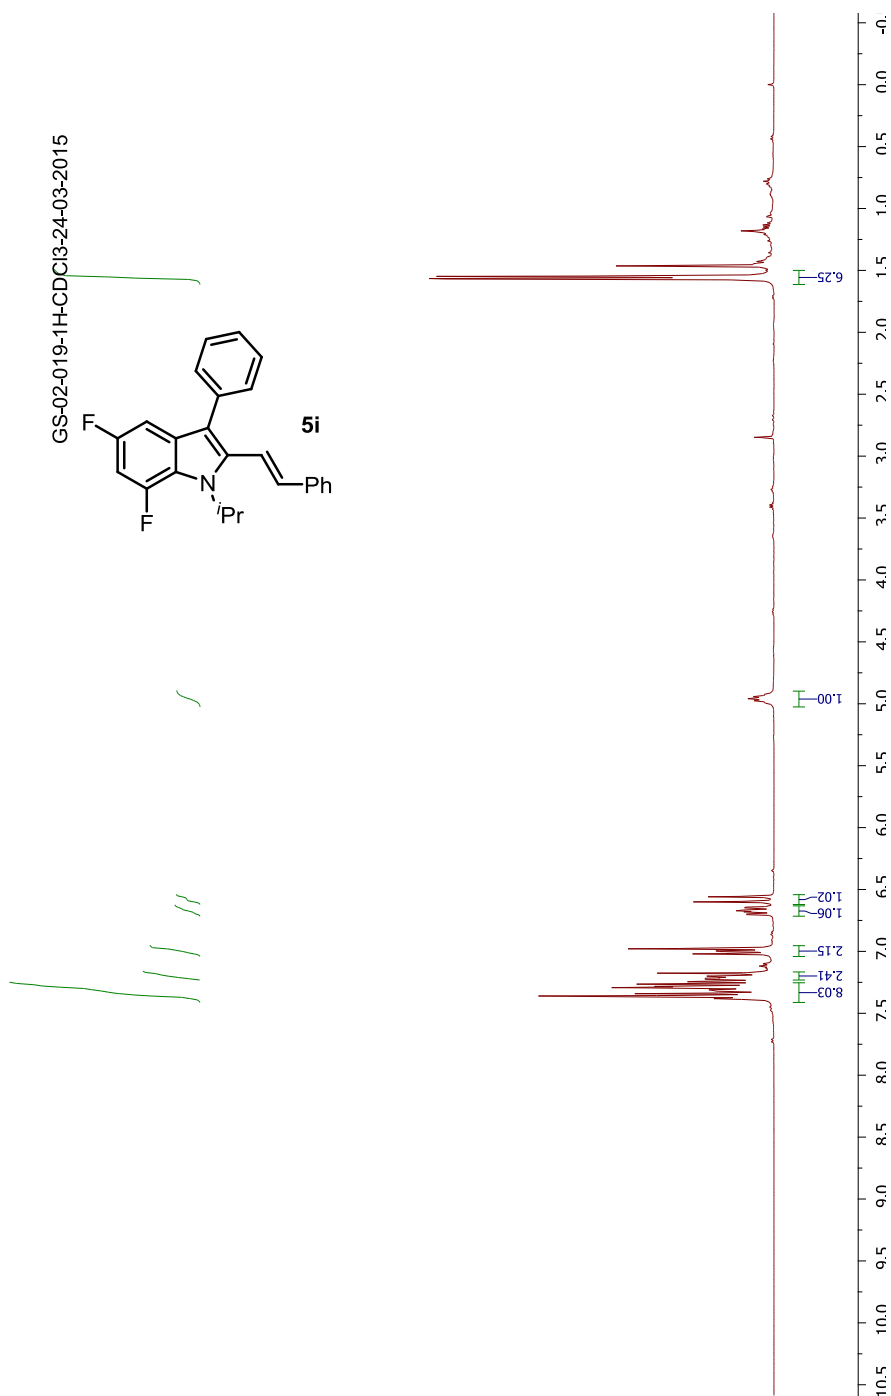

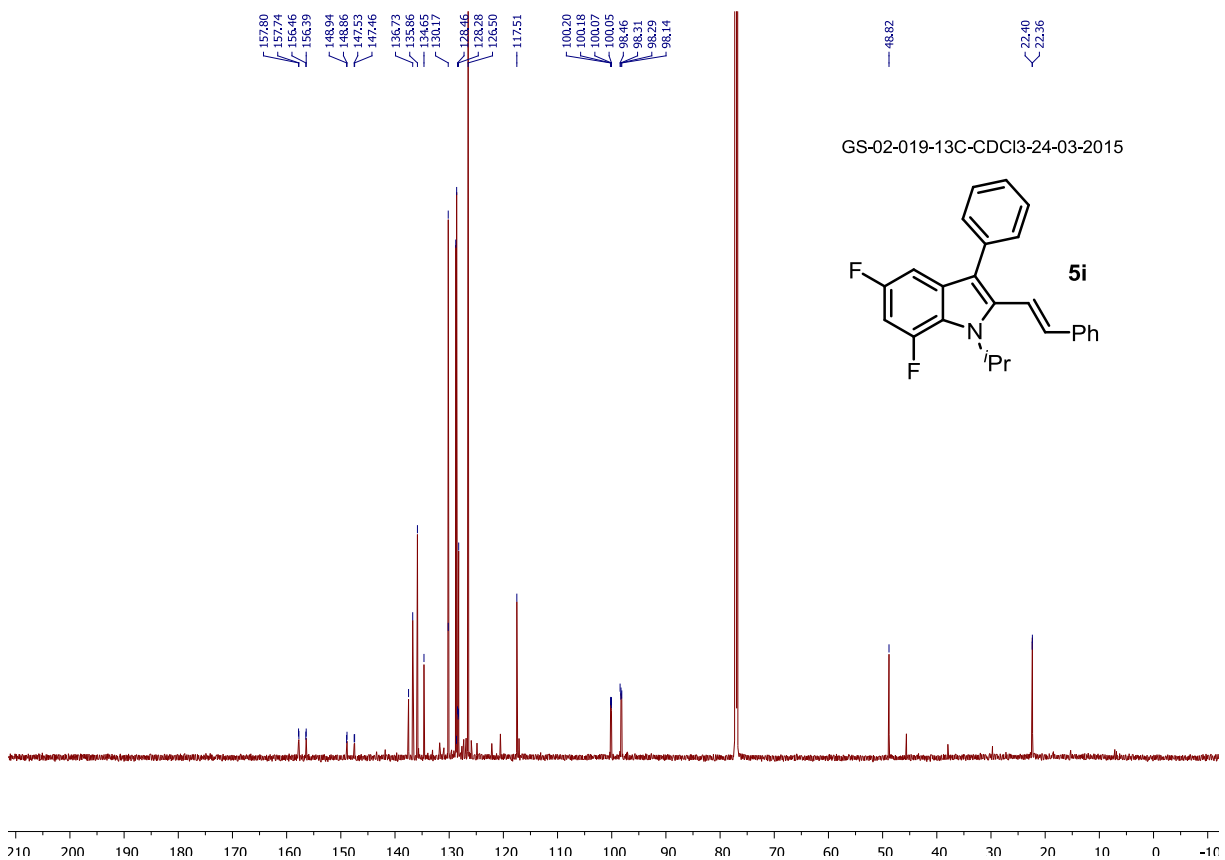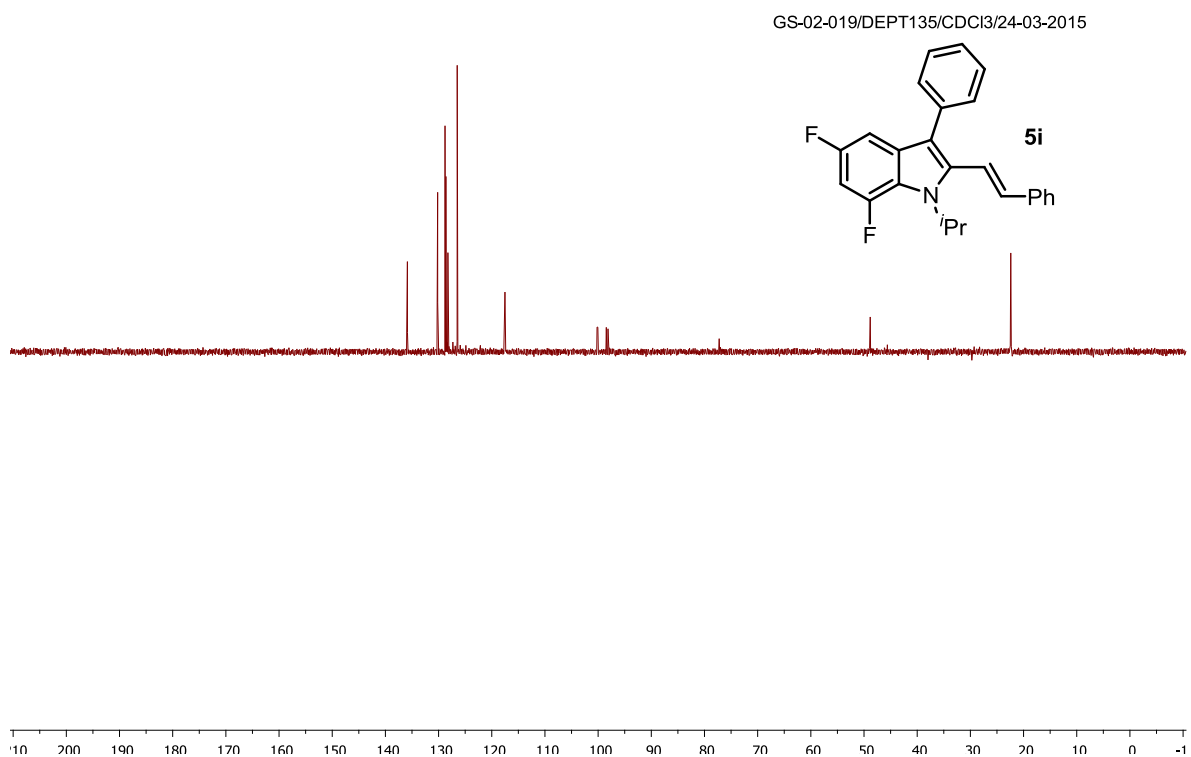

[illegible]

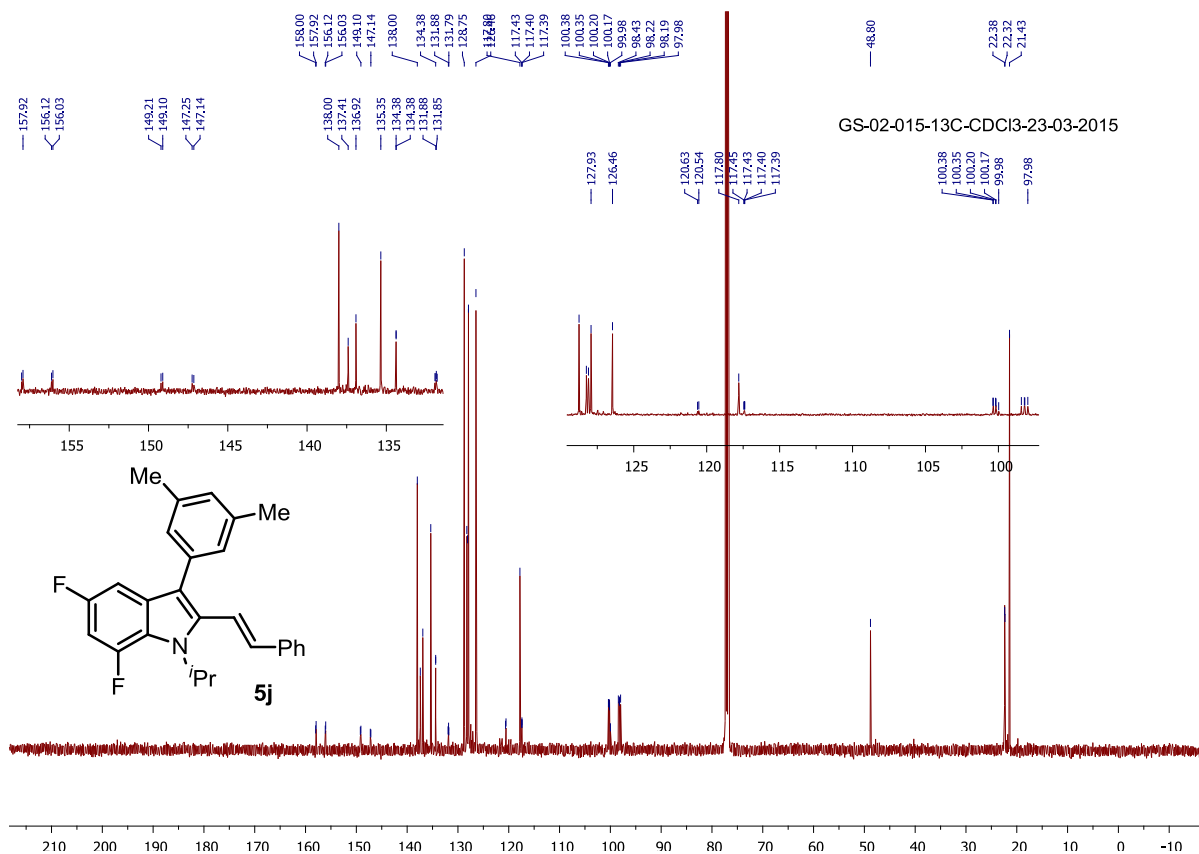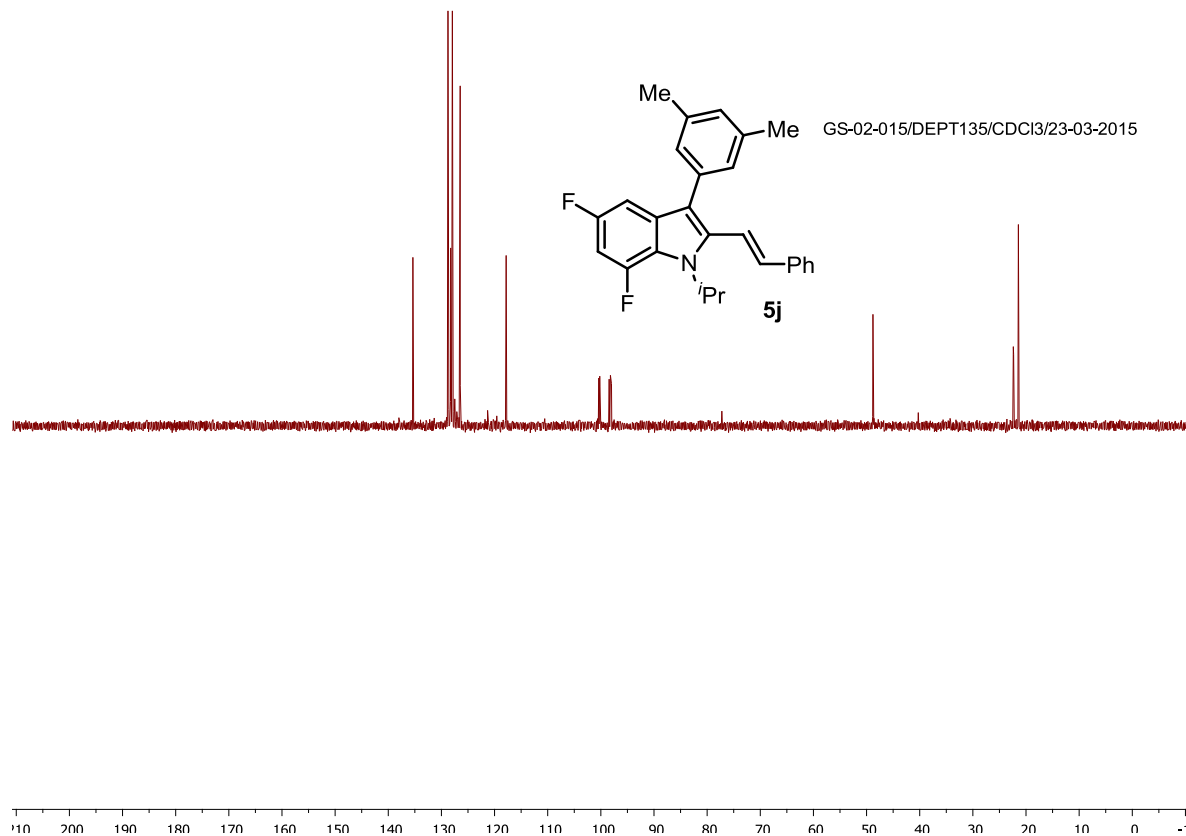

GS-2014021-005R/1H/CDCl3/20-10-2014

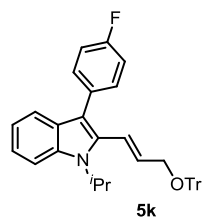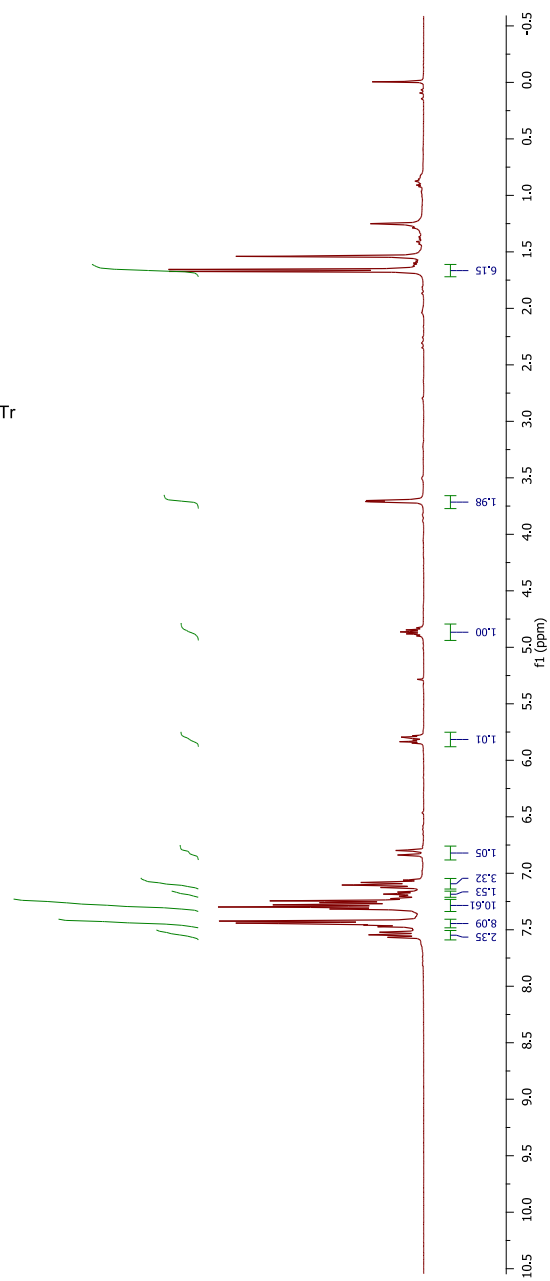

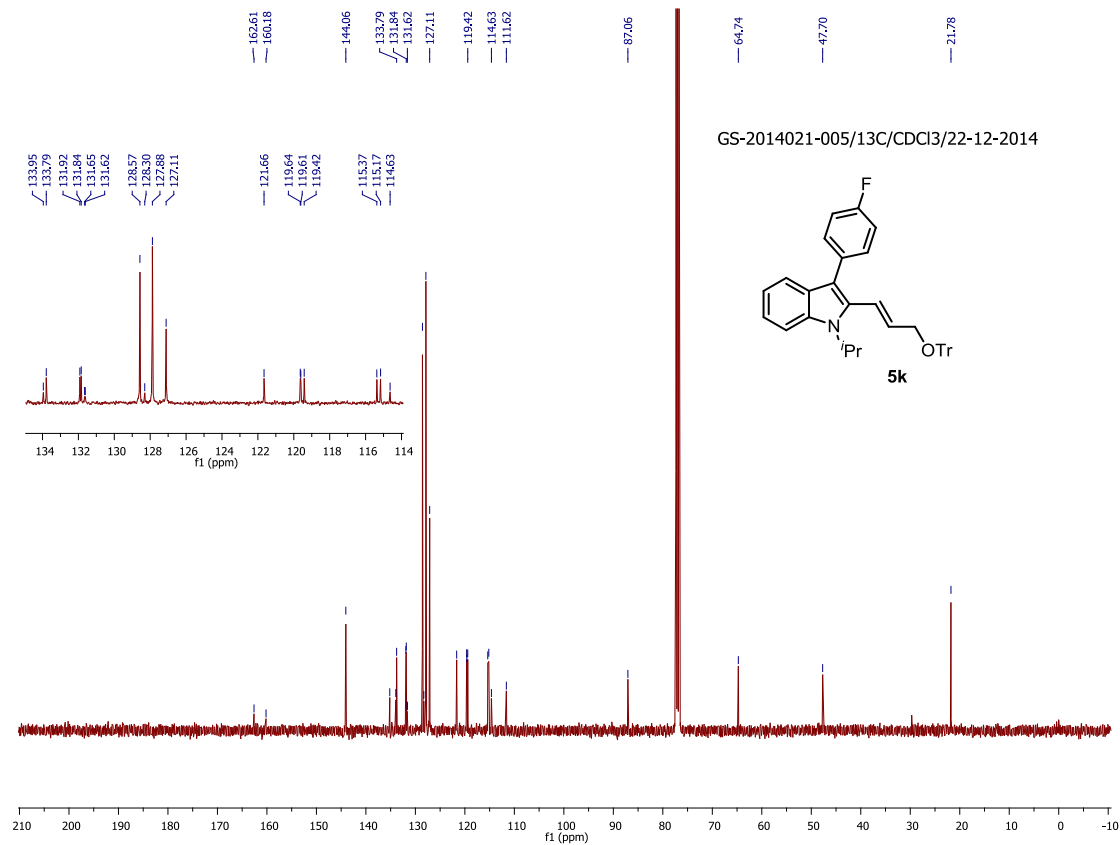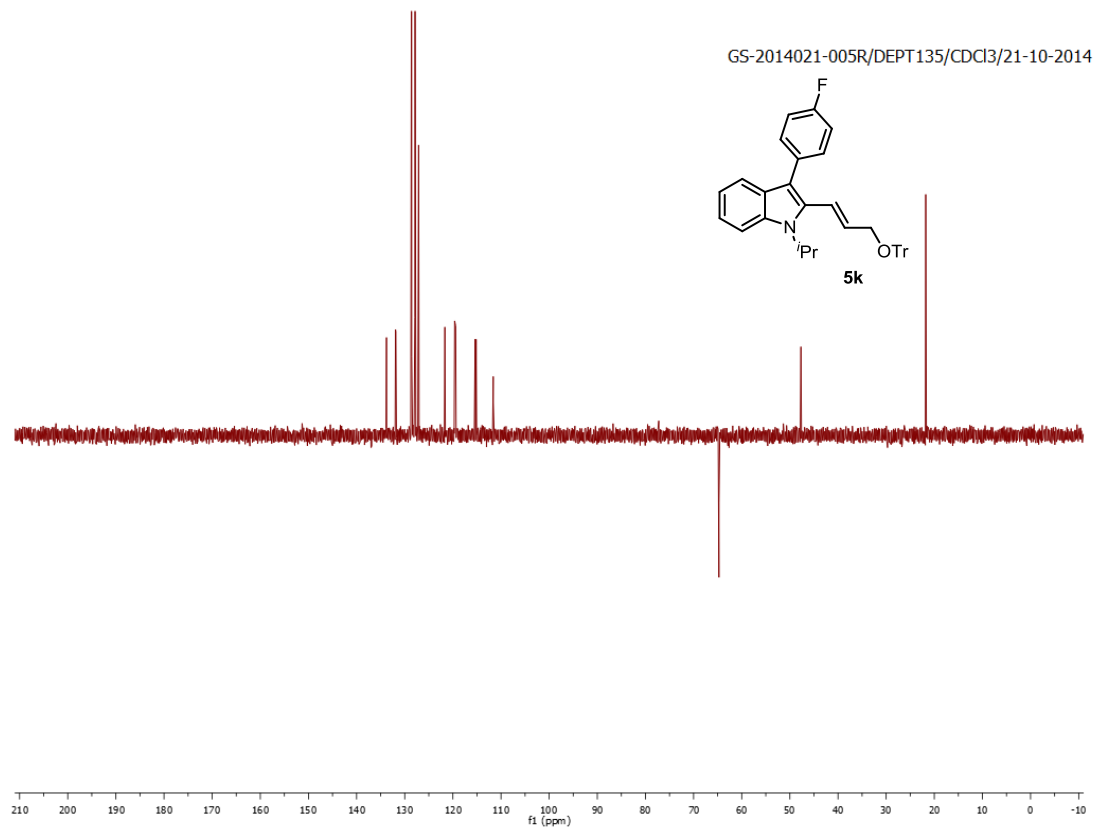

GS-2014021-004P/1H/CDCl3/09-10-2014

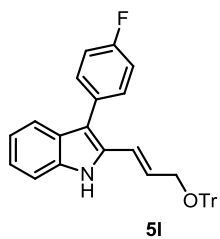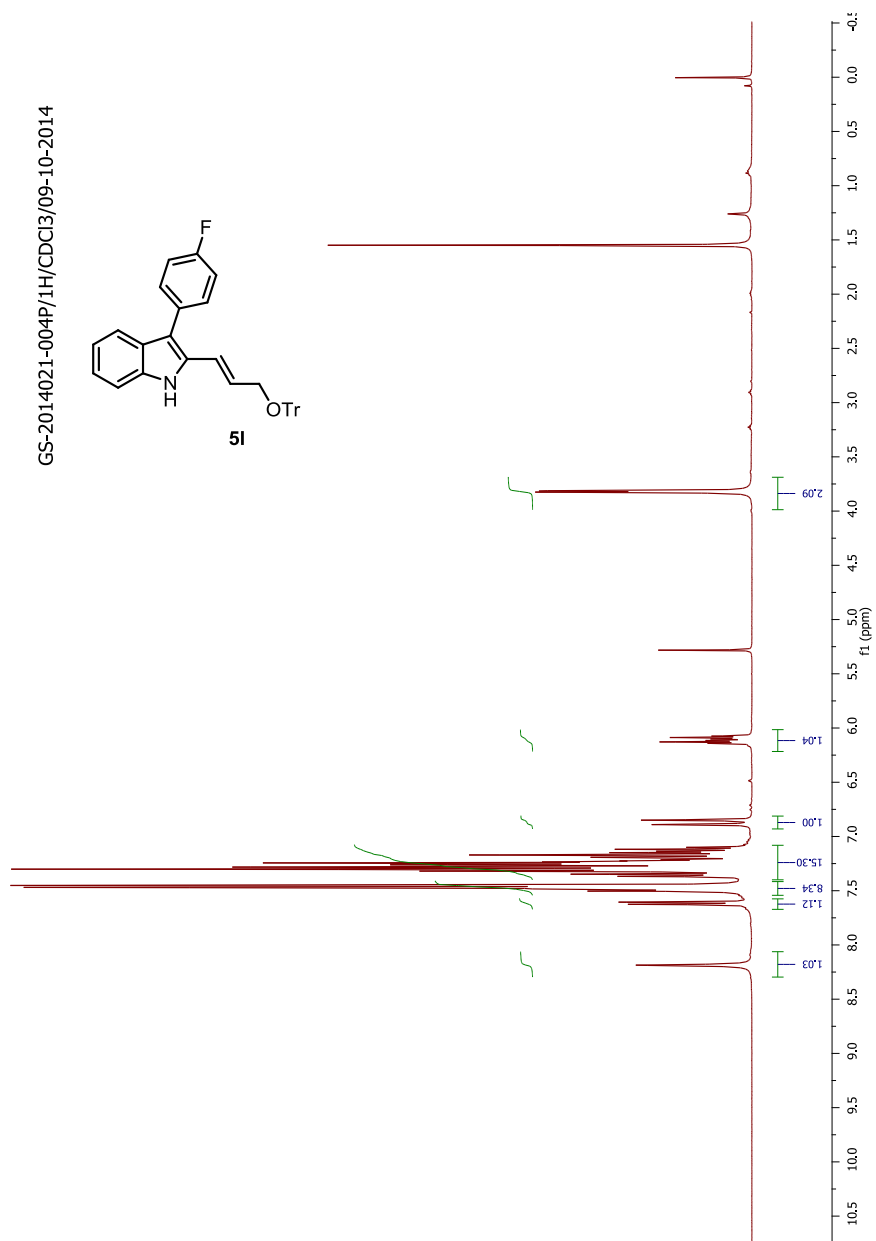



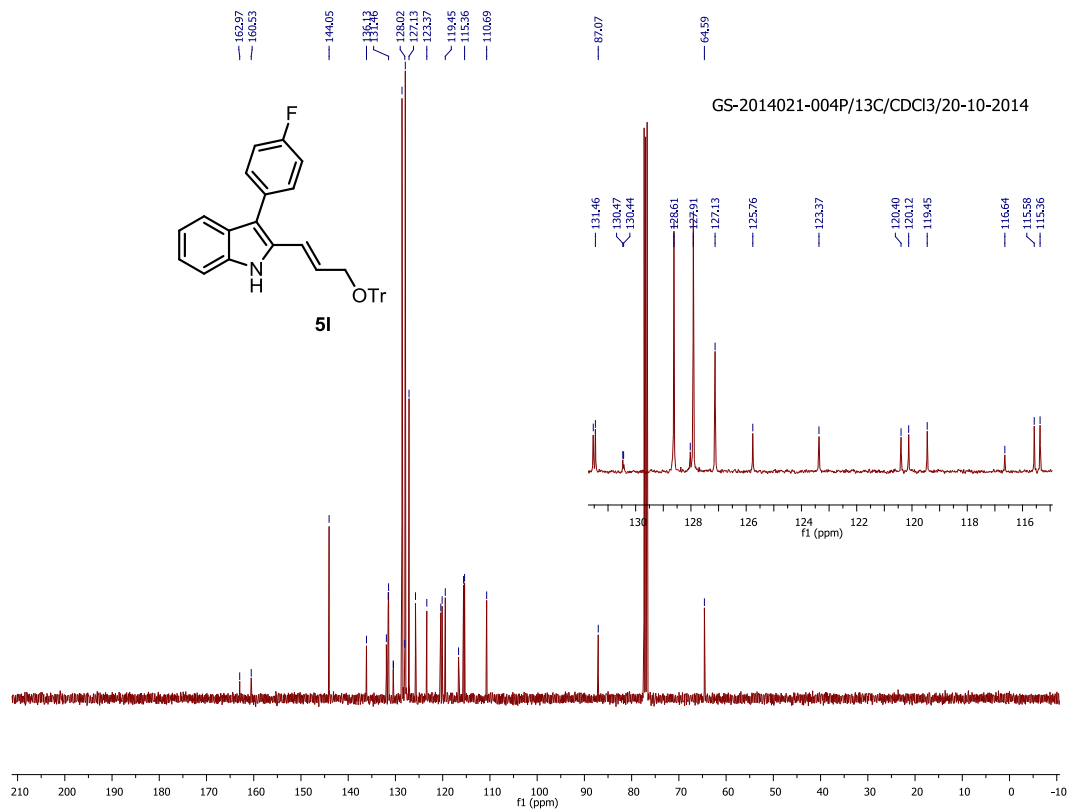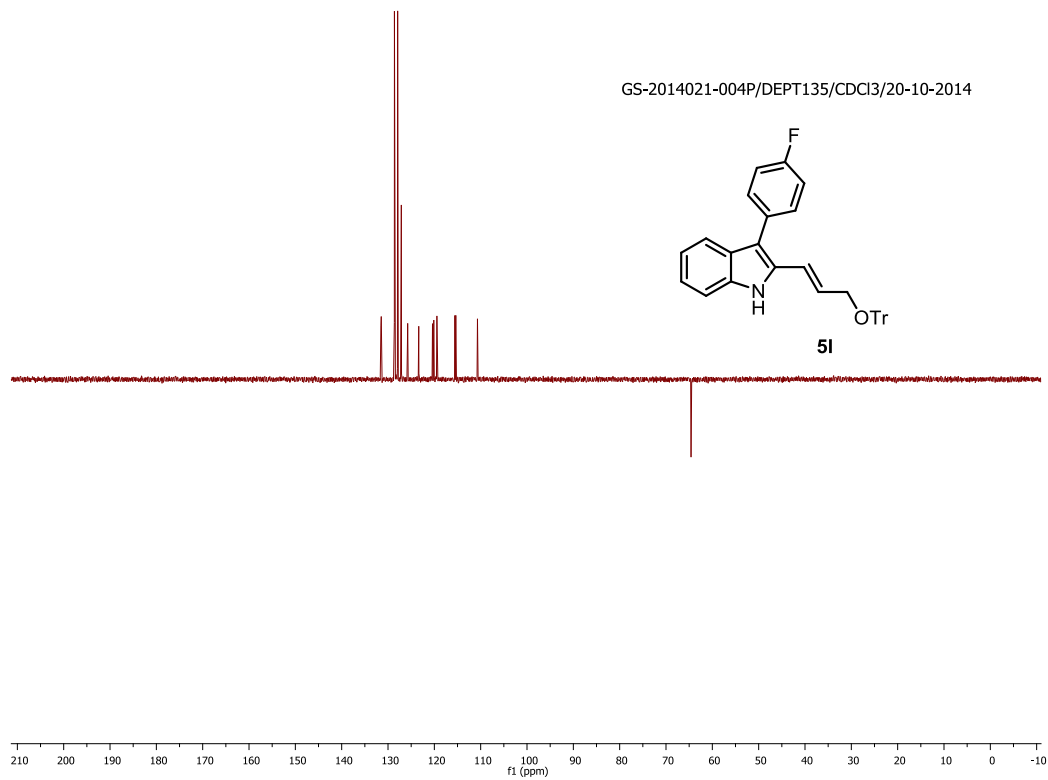

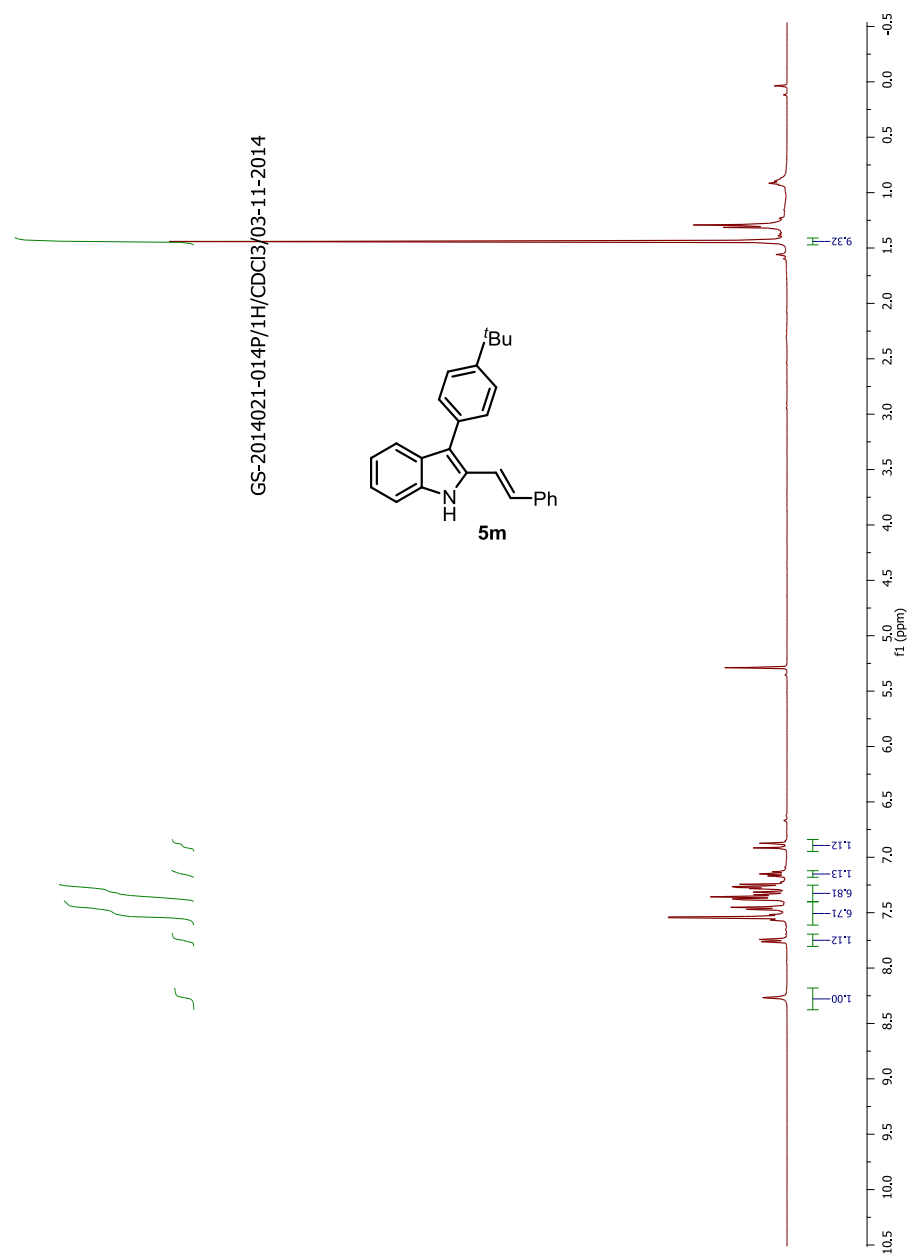

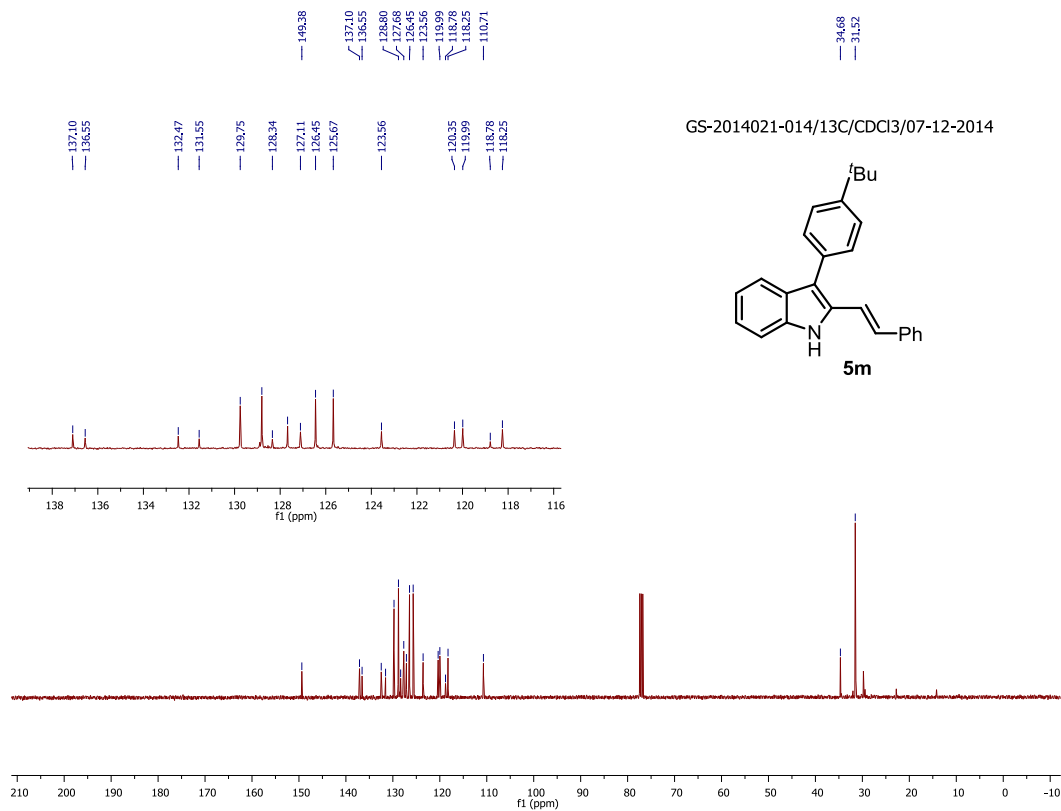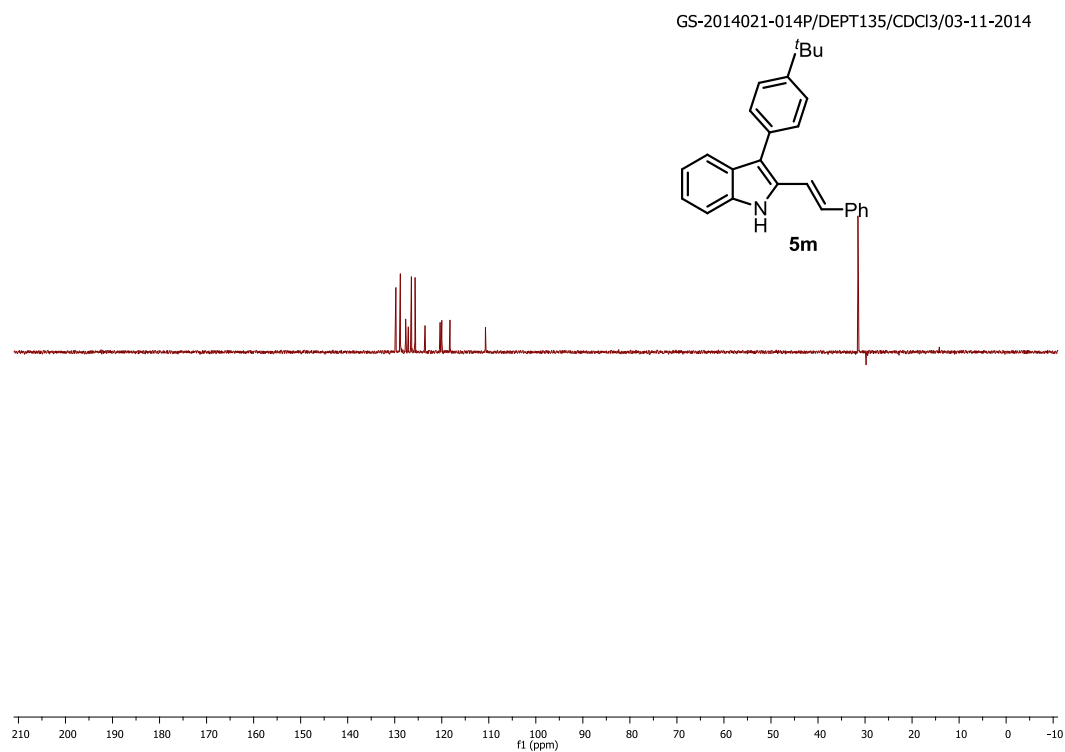

GS-02-020-1H-CDCl3-25-03-2015

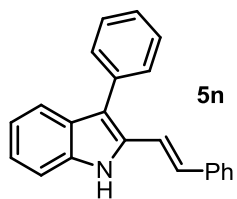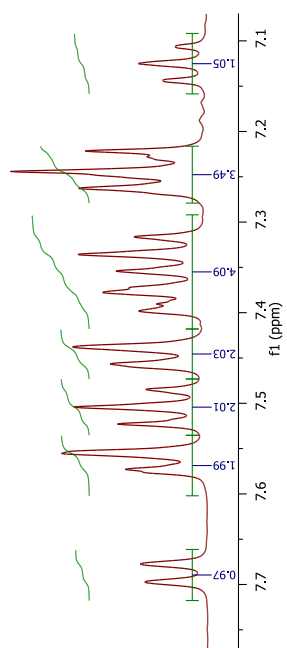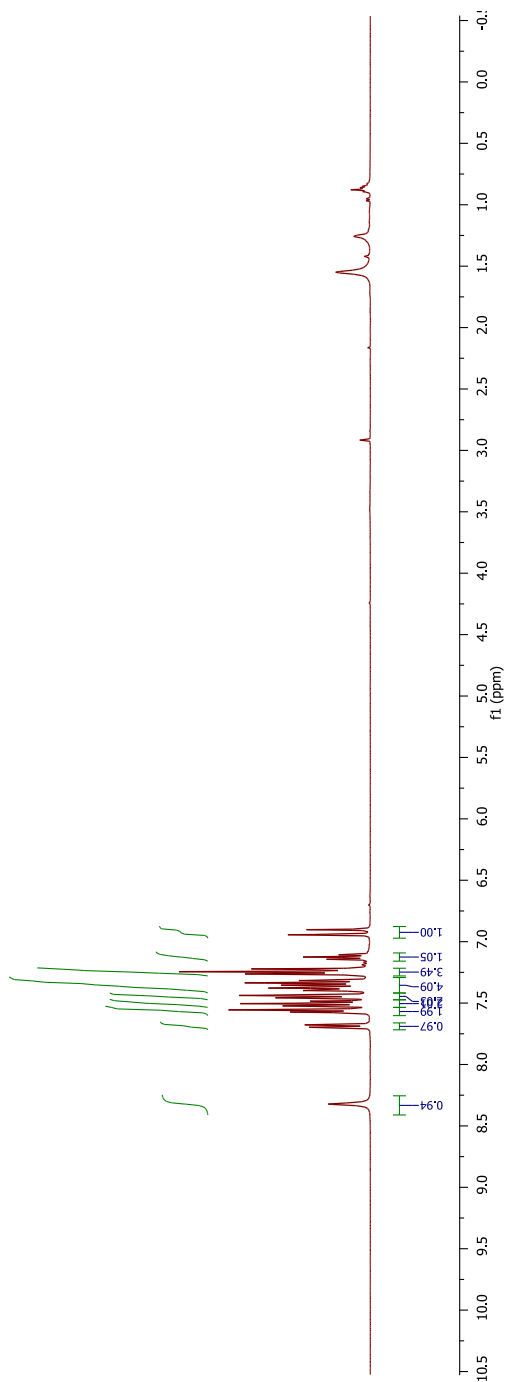

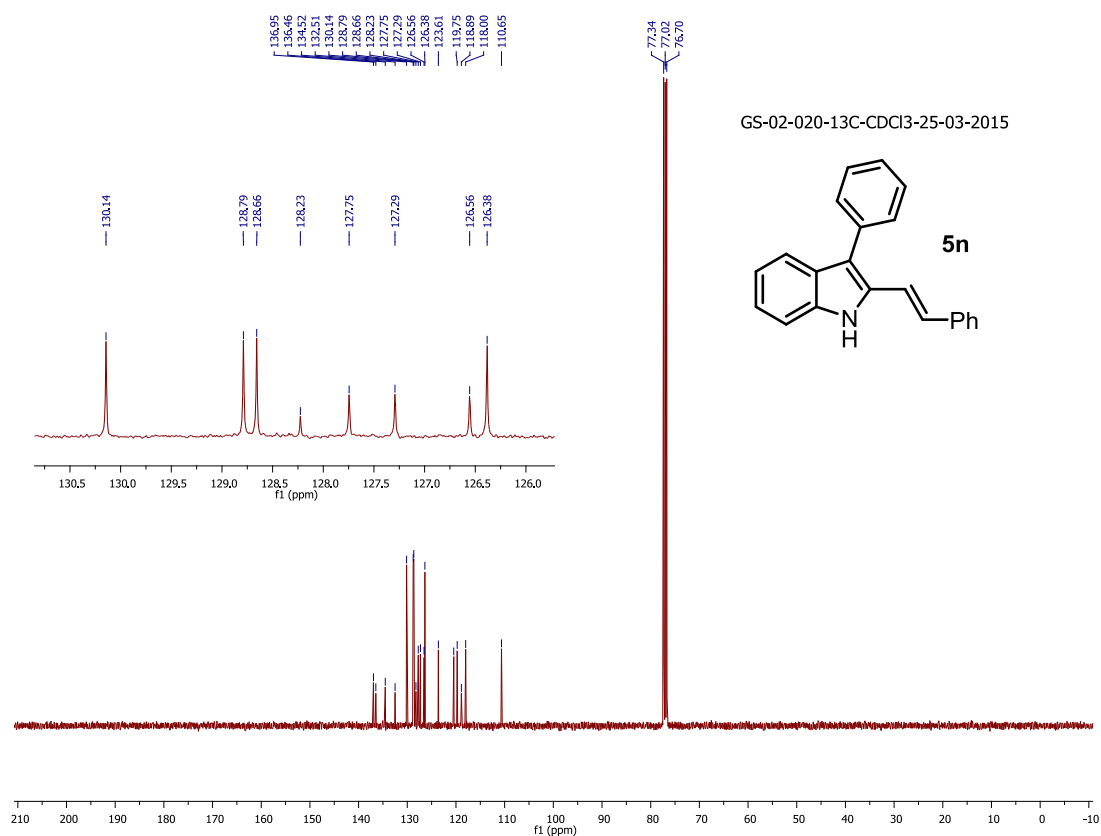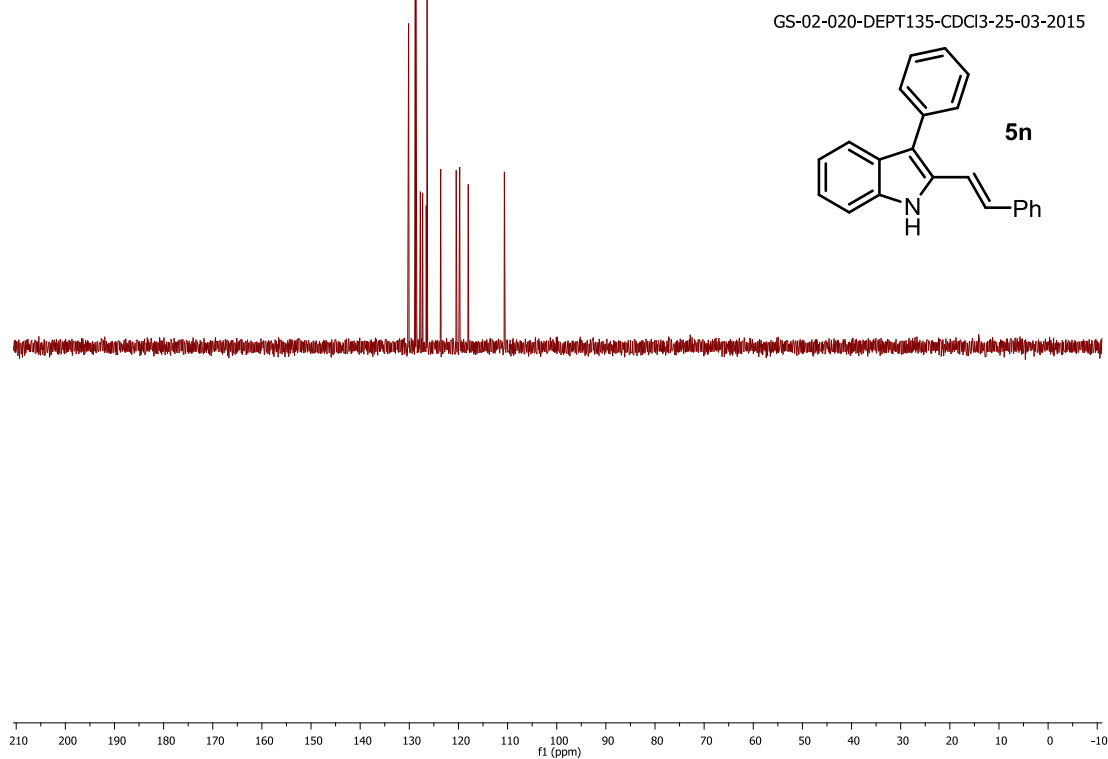

GS-02-039/1H/CDCI3/02-05-2015

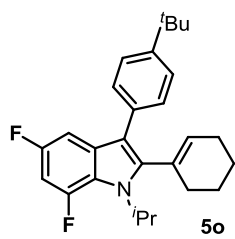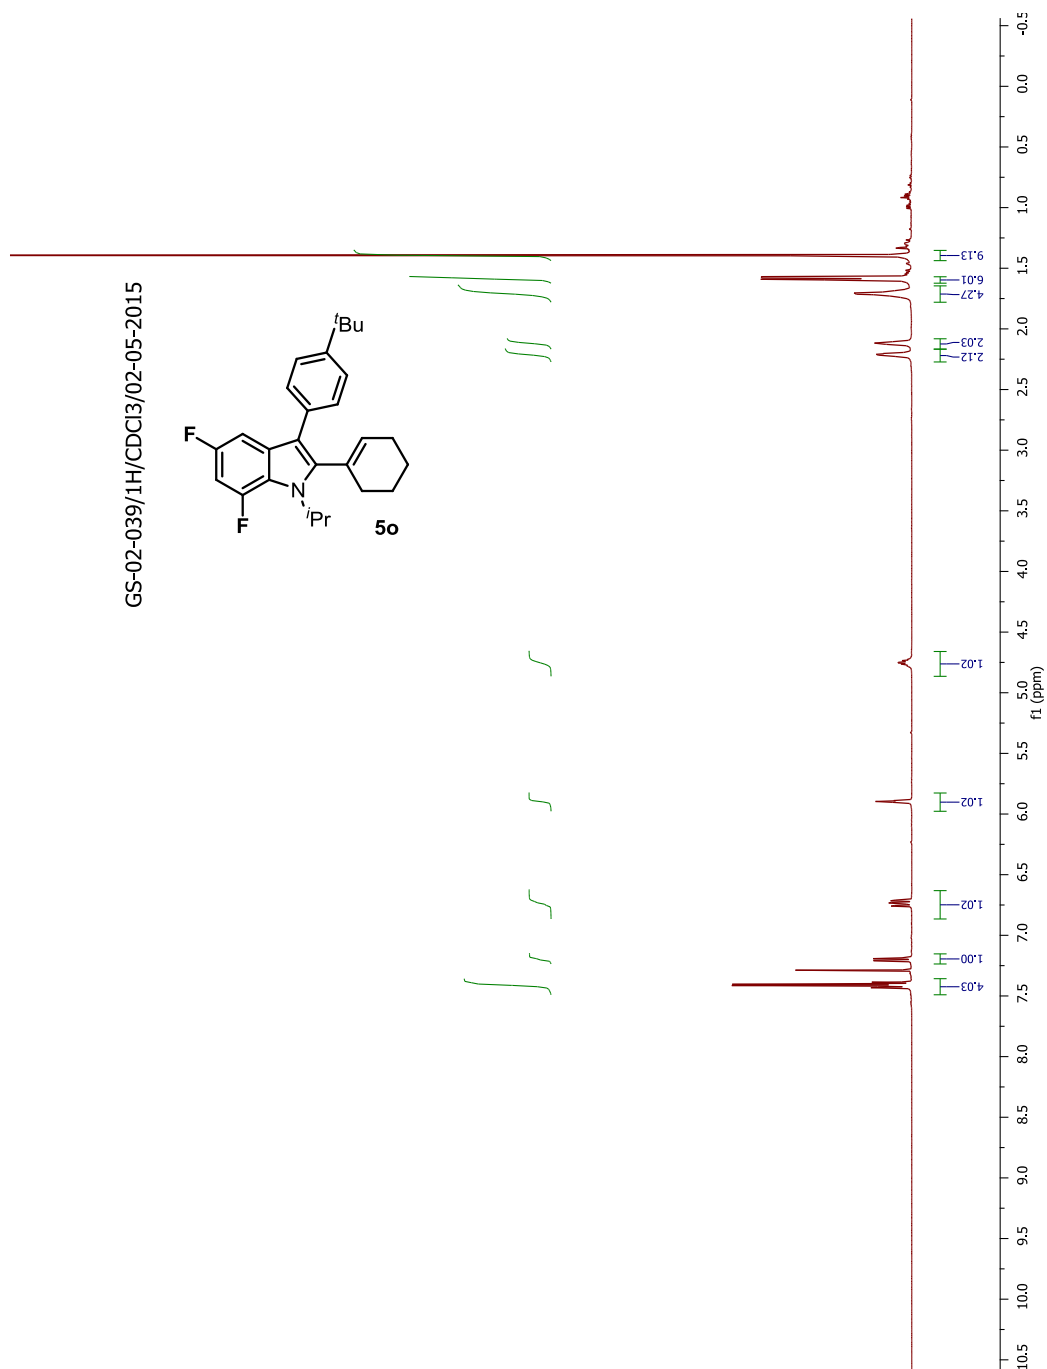

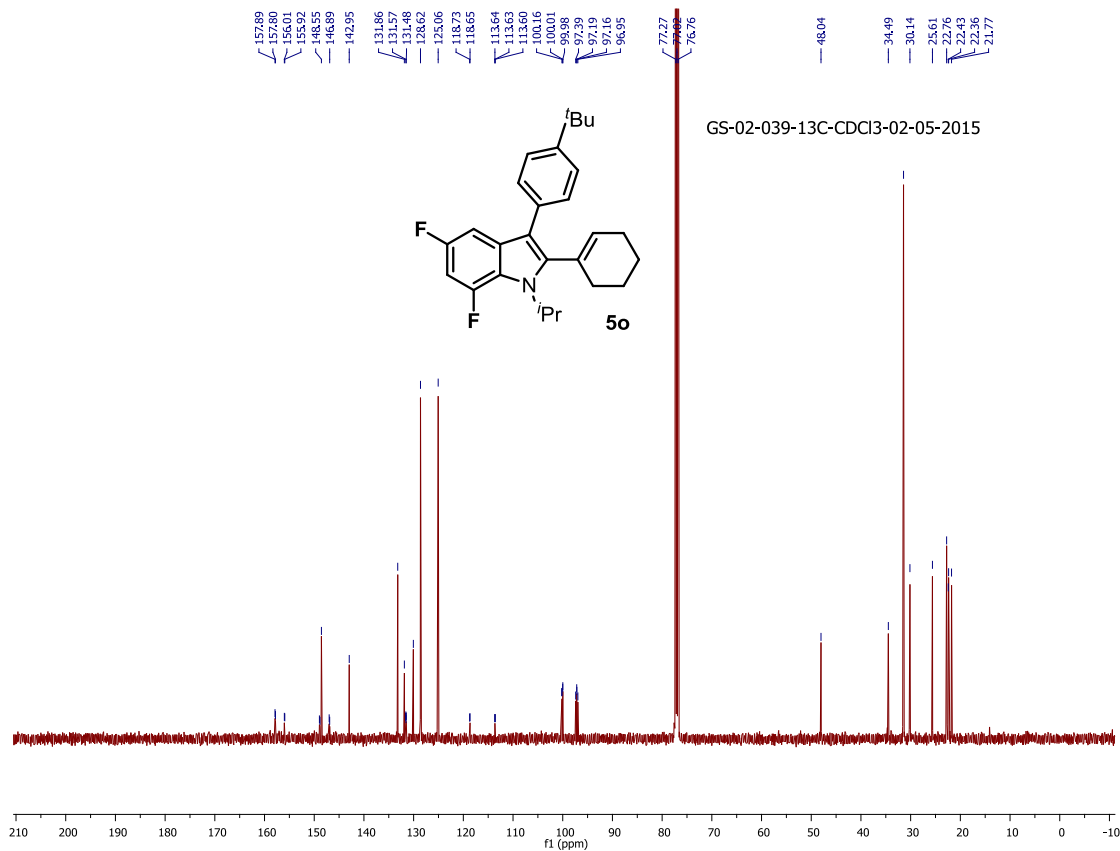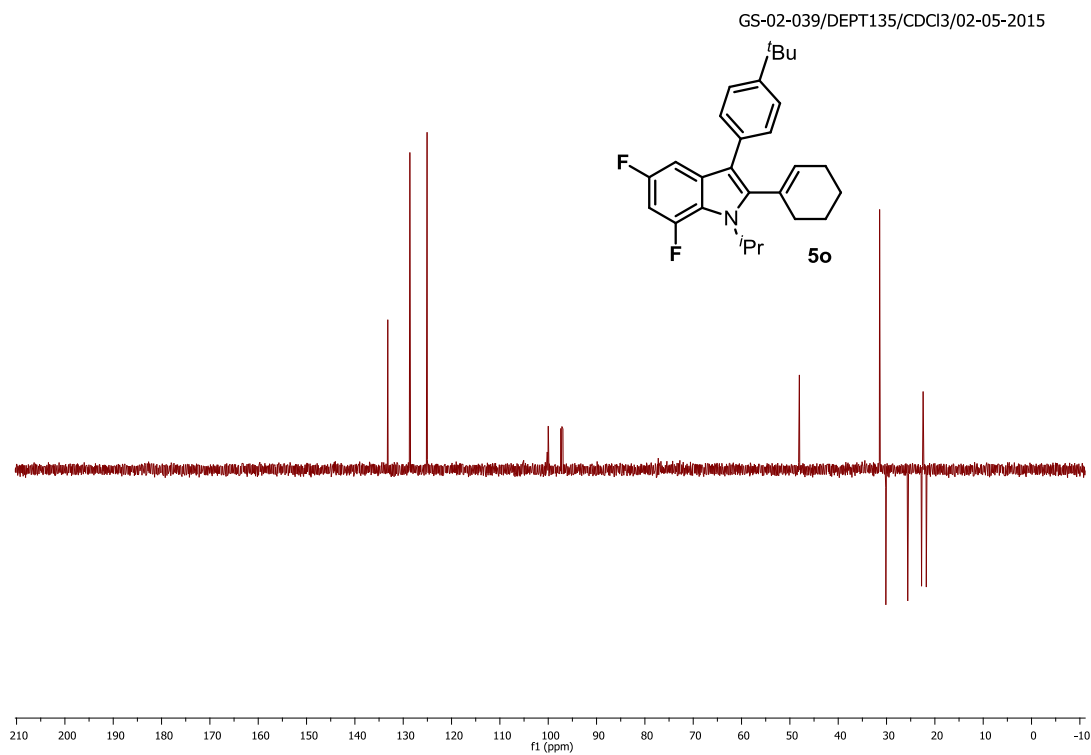

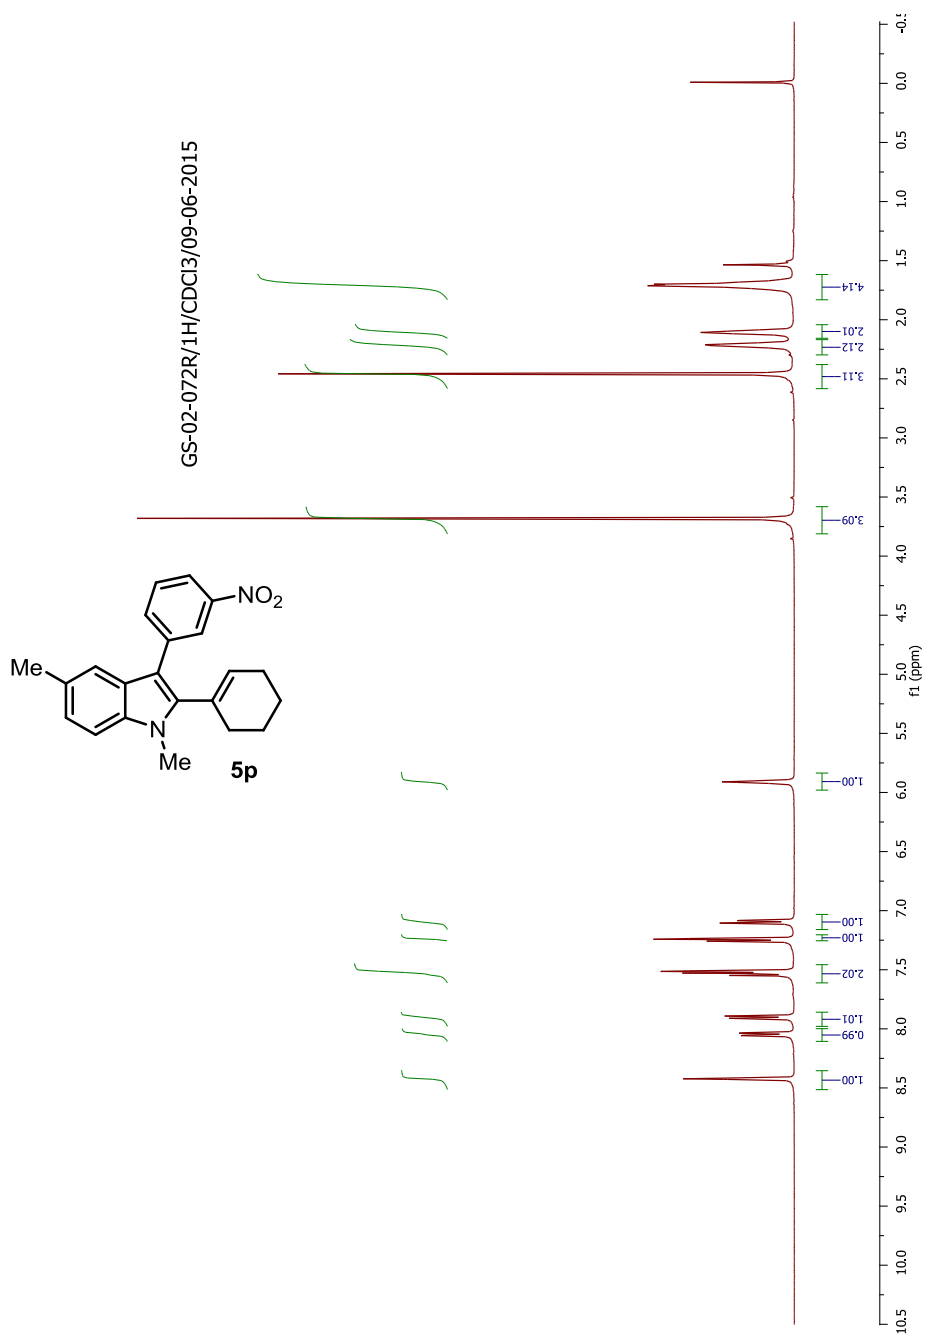



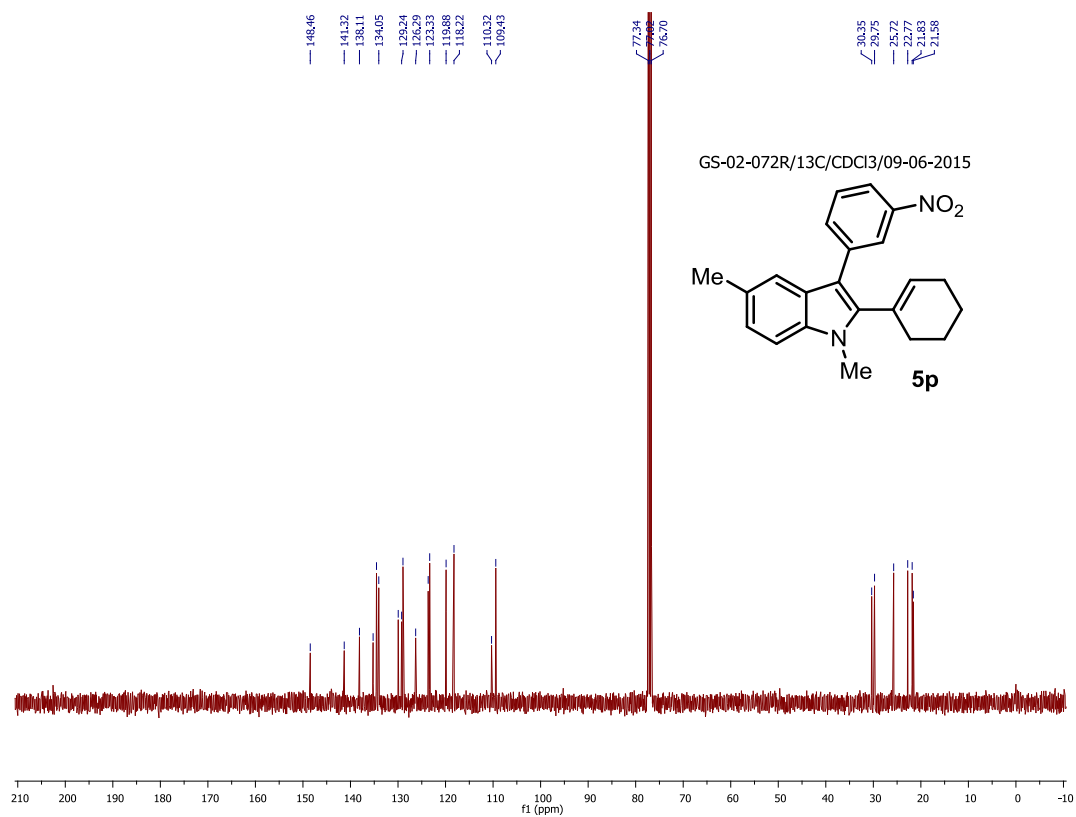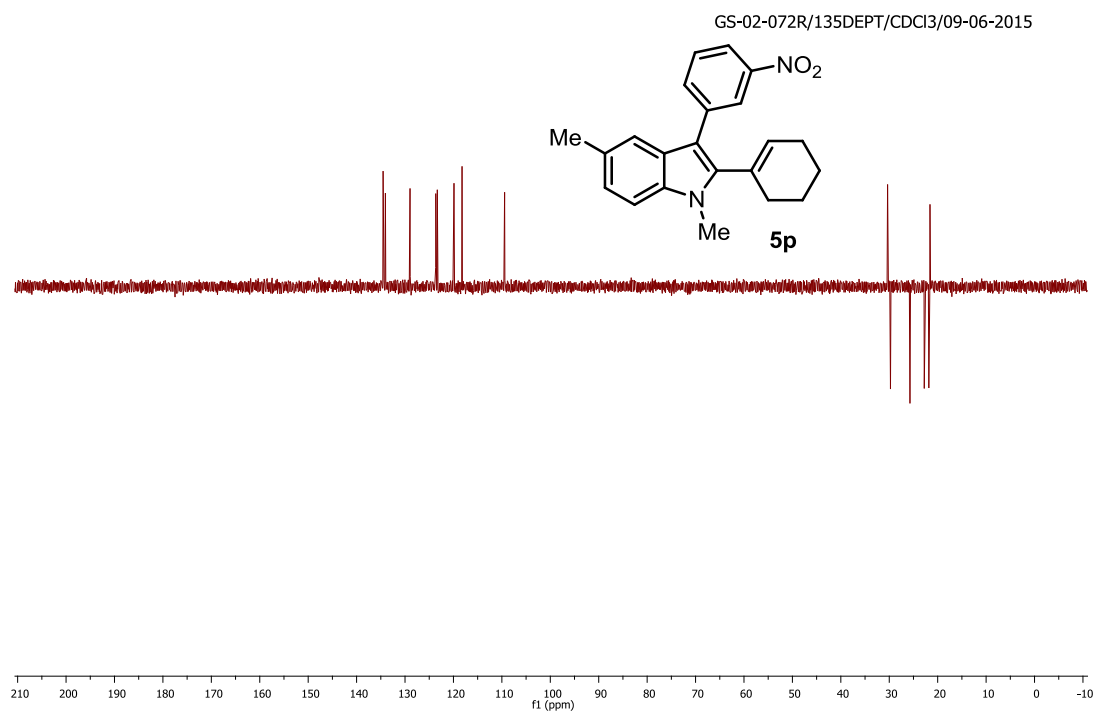

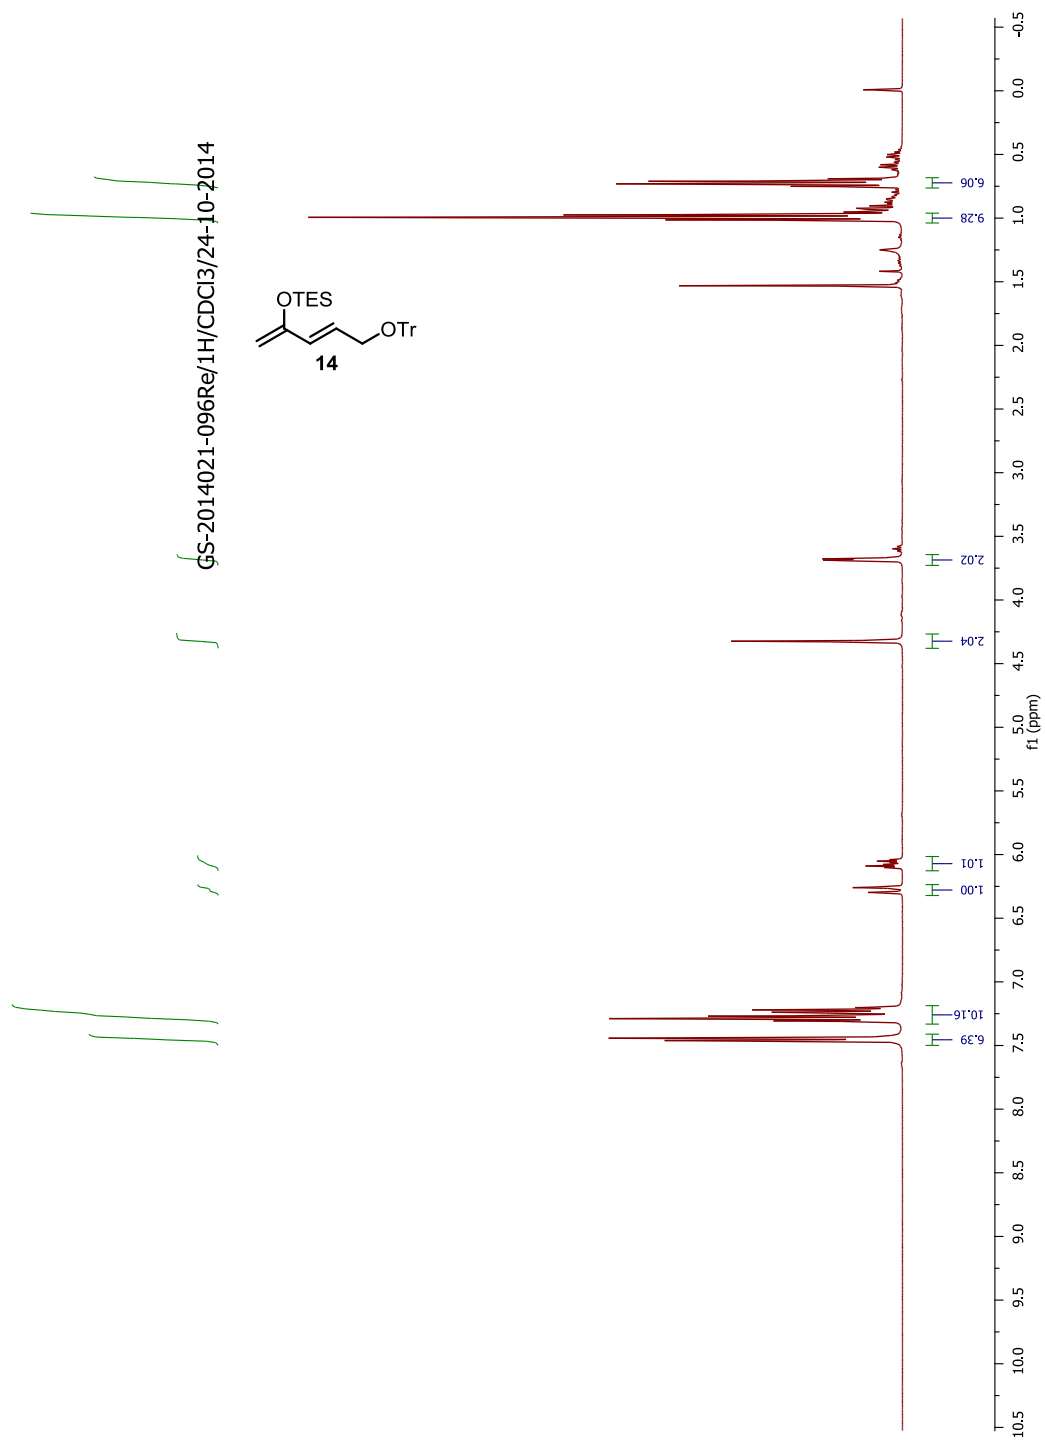

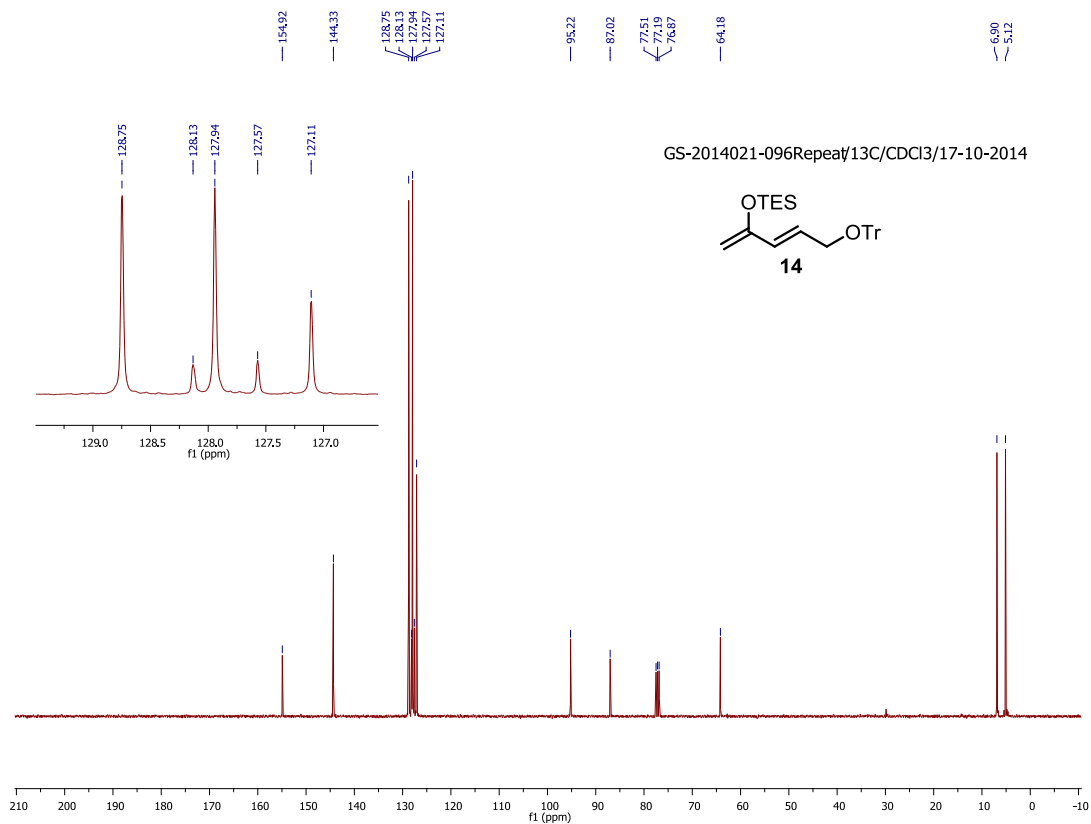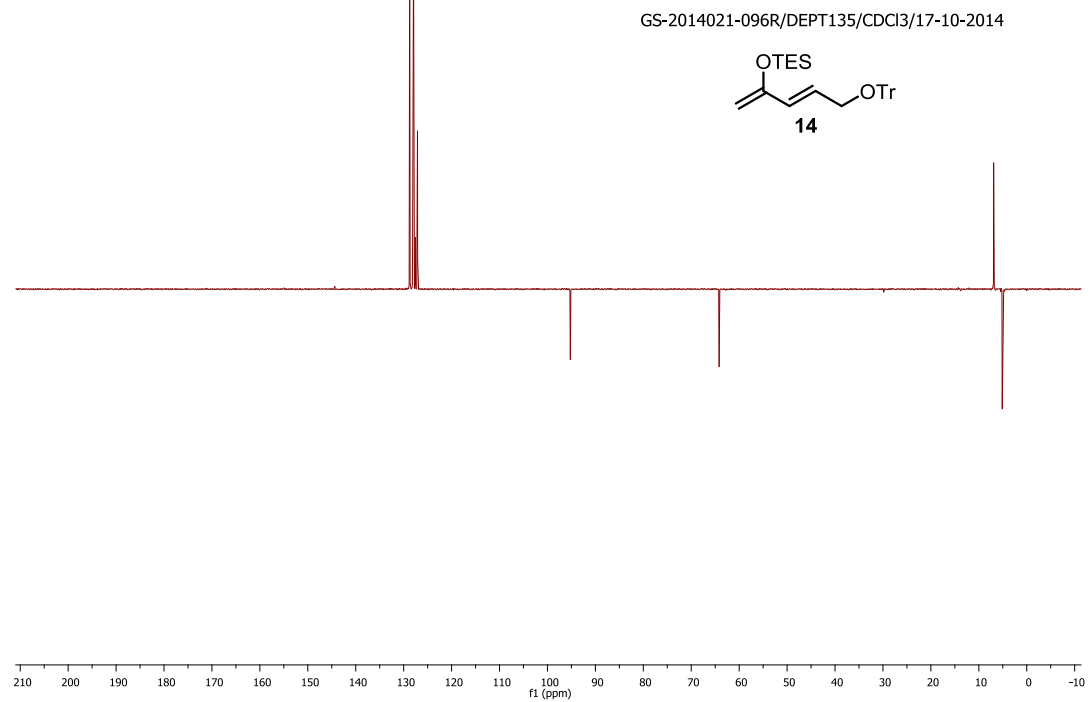

GS-2014021-098II/ <sup>1</sup>H/CDCI3/09-10-2014

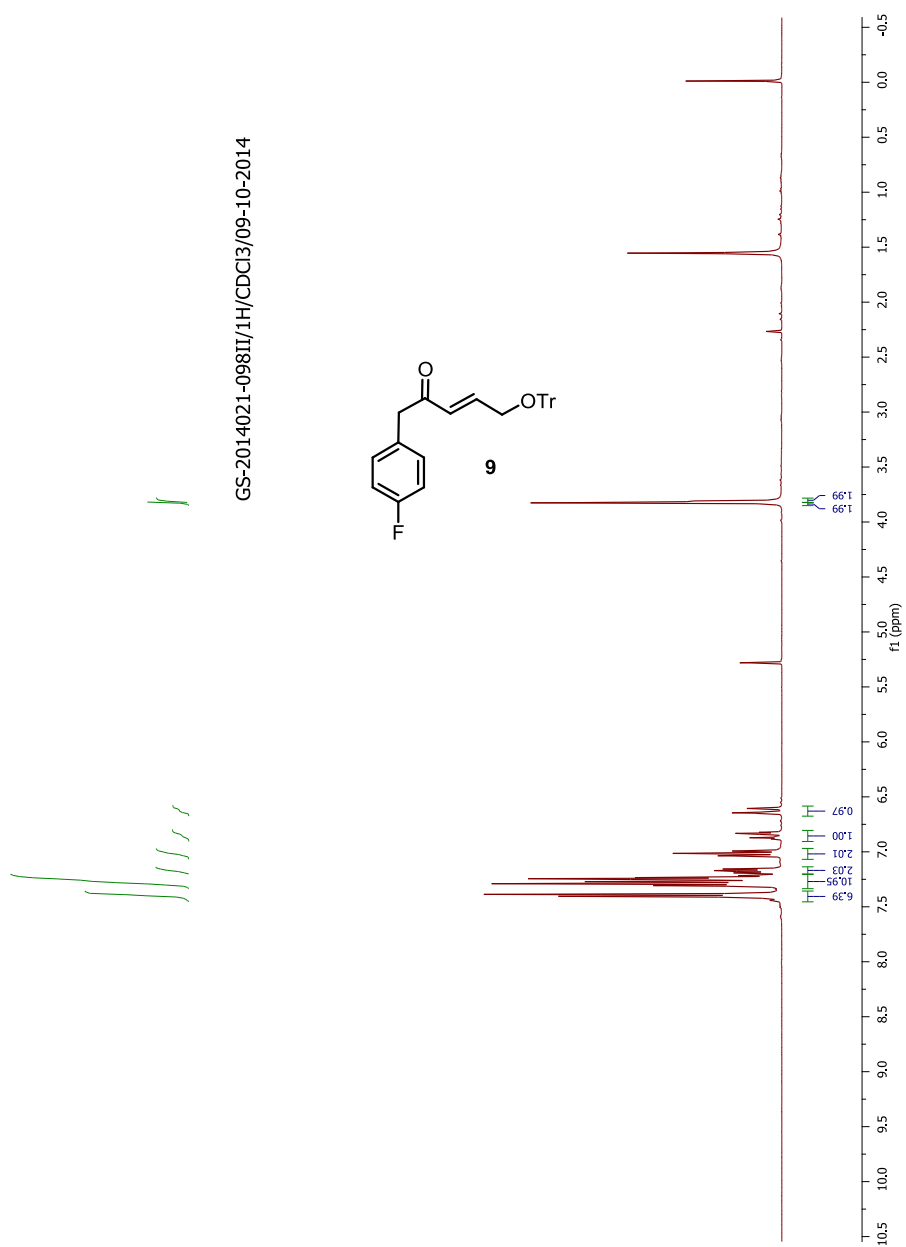

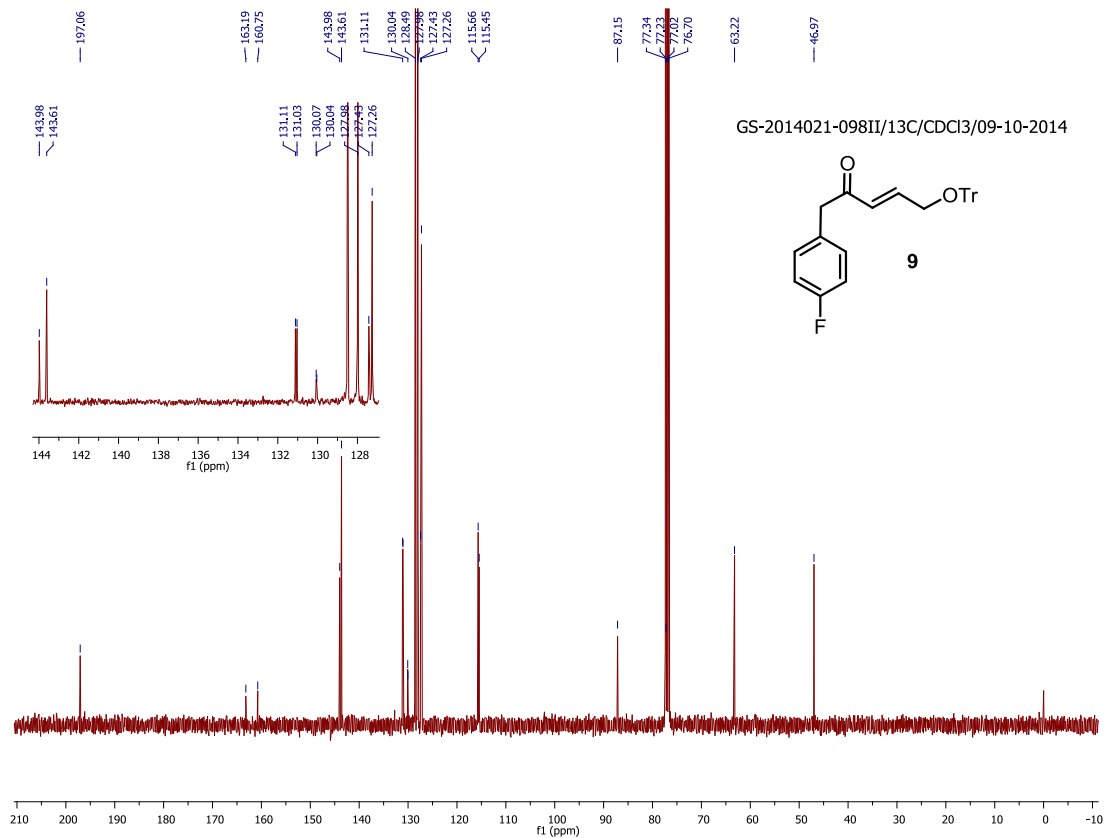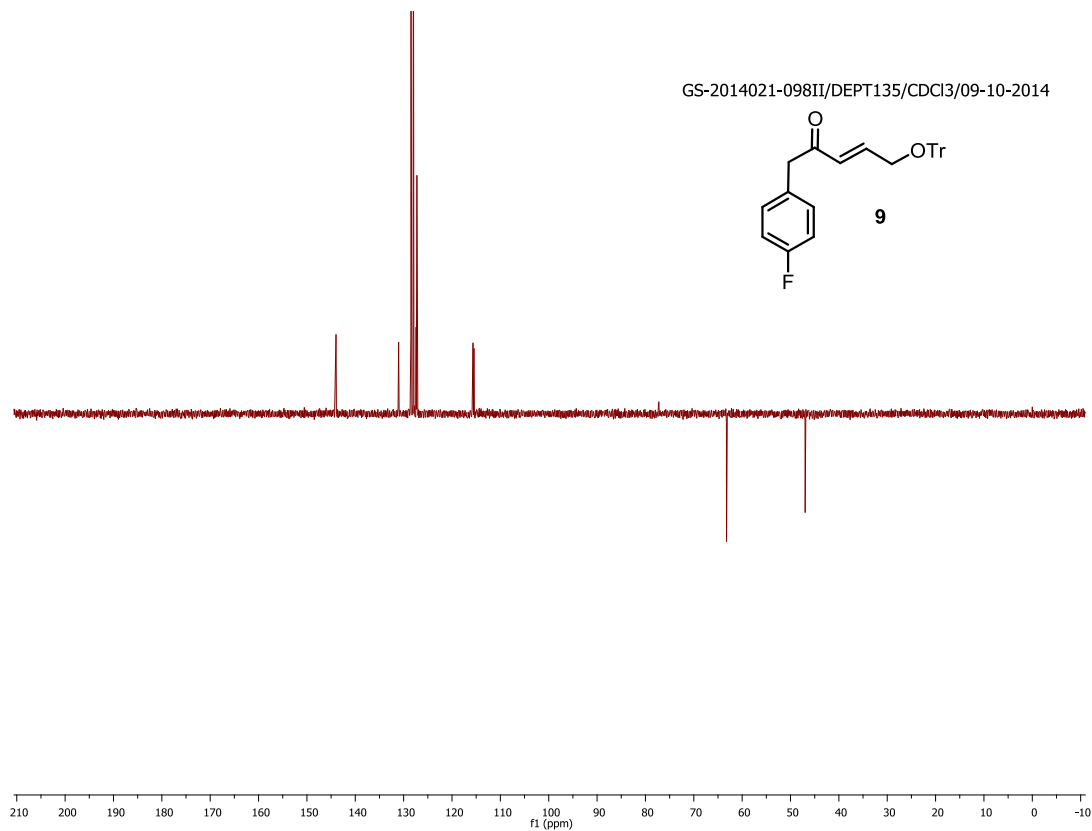

GS-2014021-003/1H/CDCI3/13-12-2014

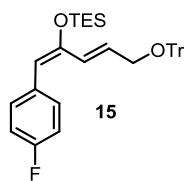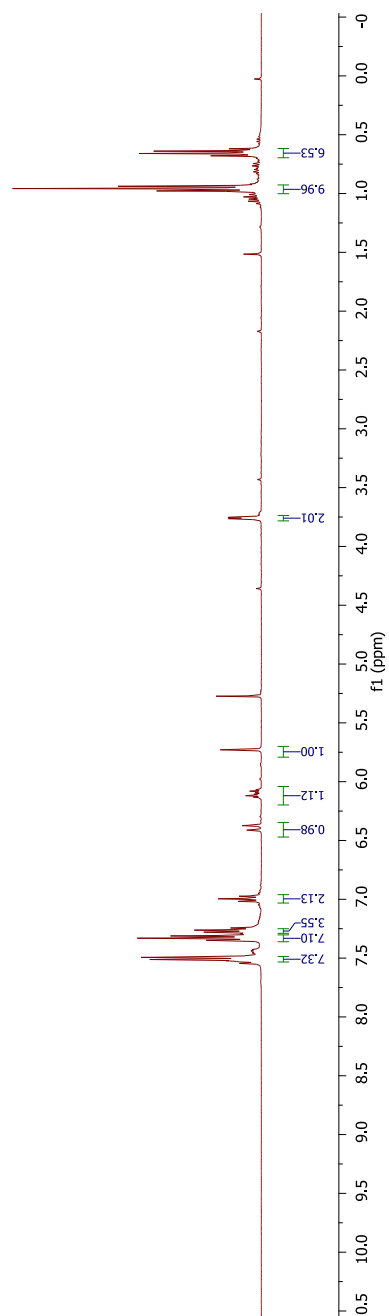

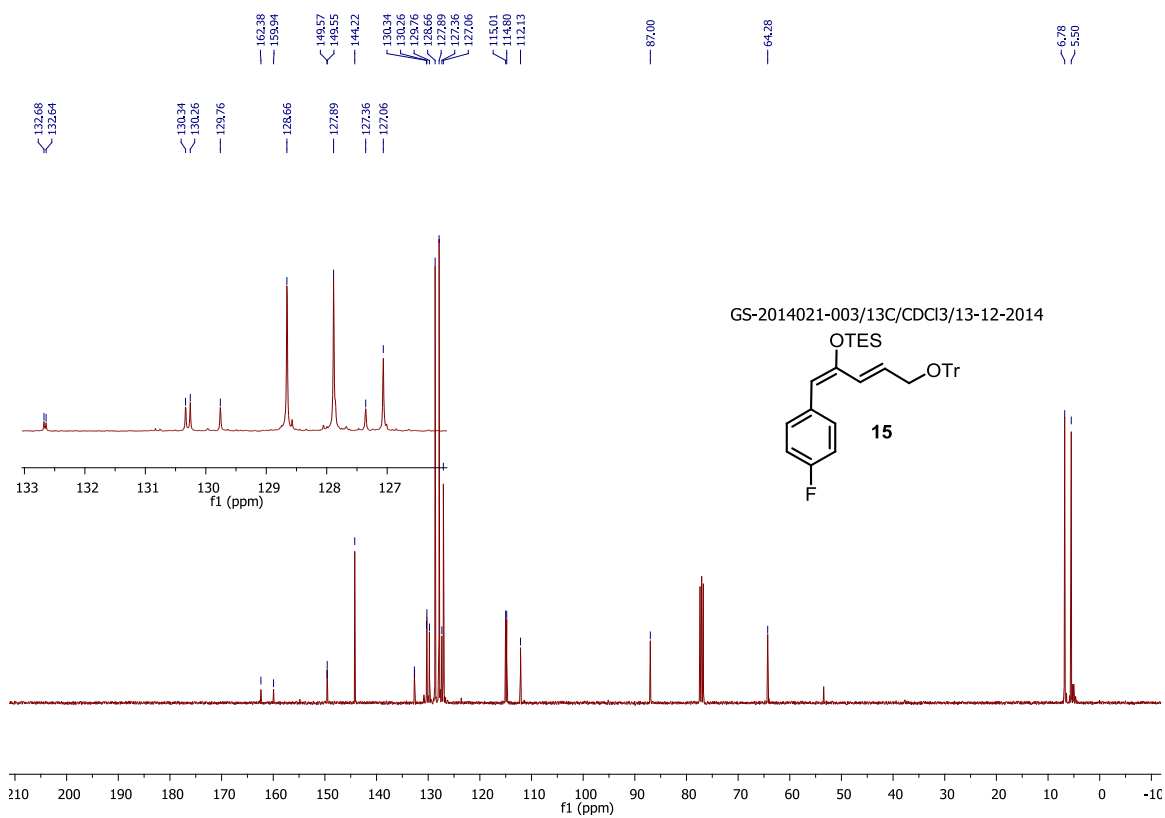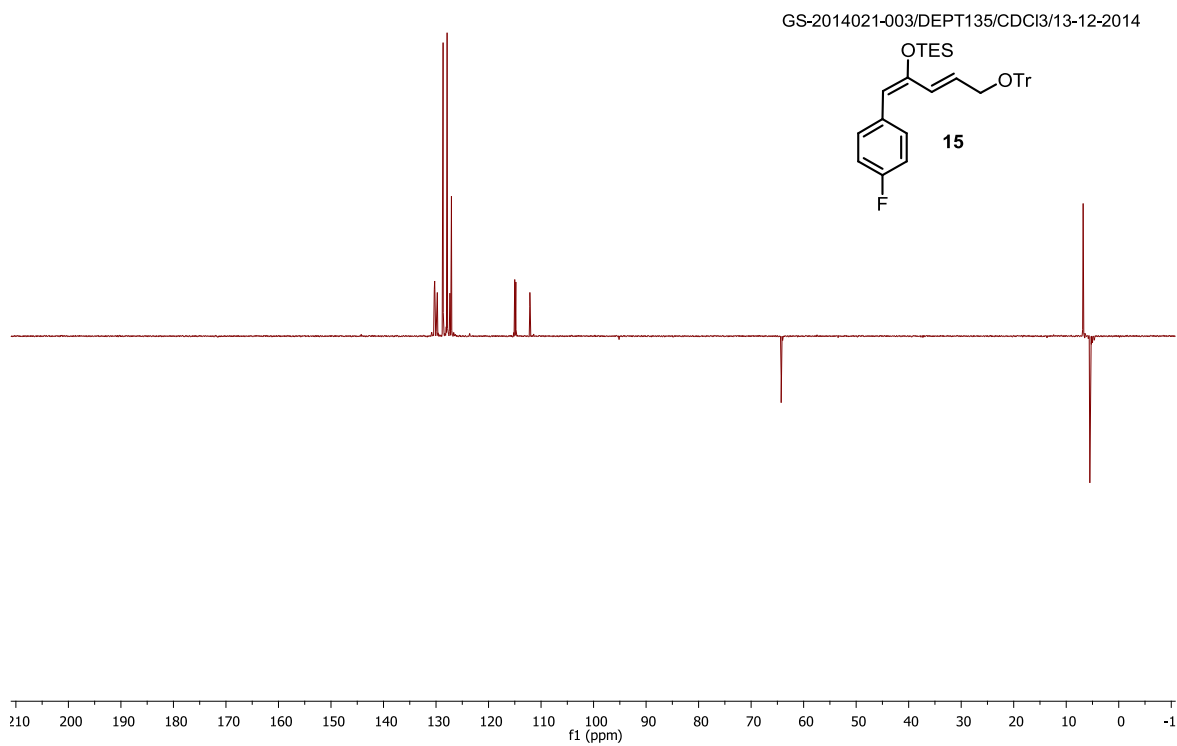

GS-2014021-013/1H/CDC13/30-10-2014

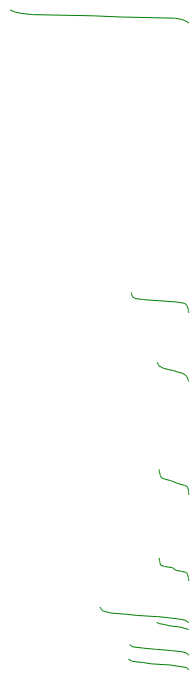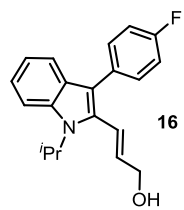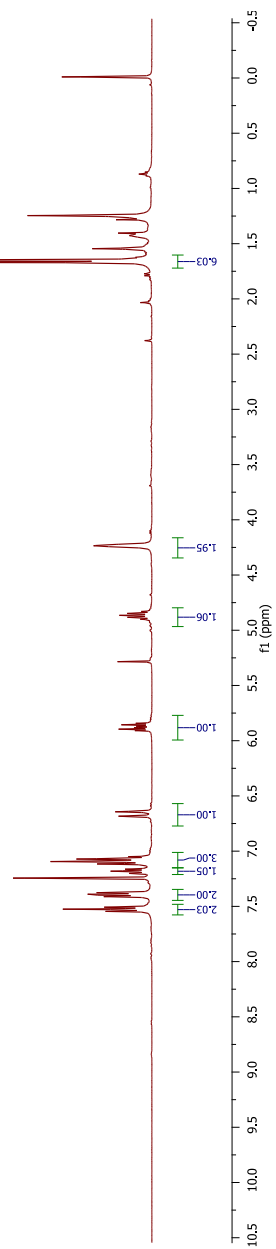



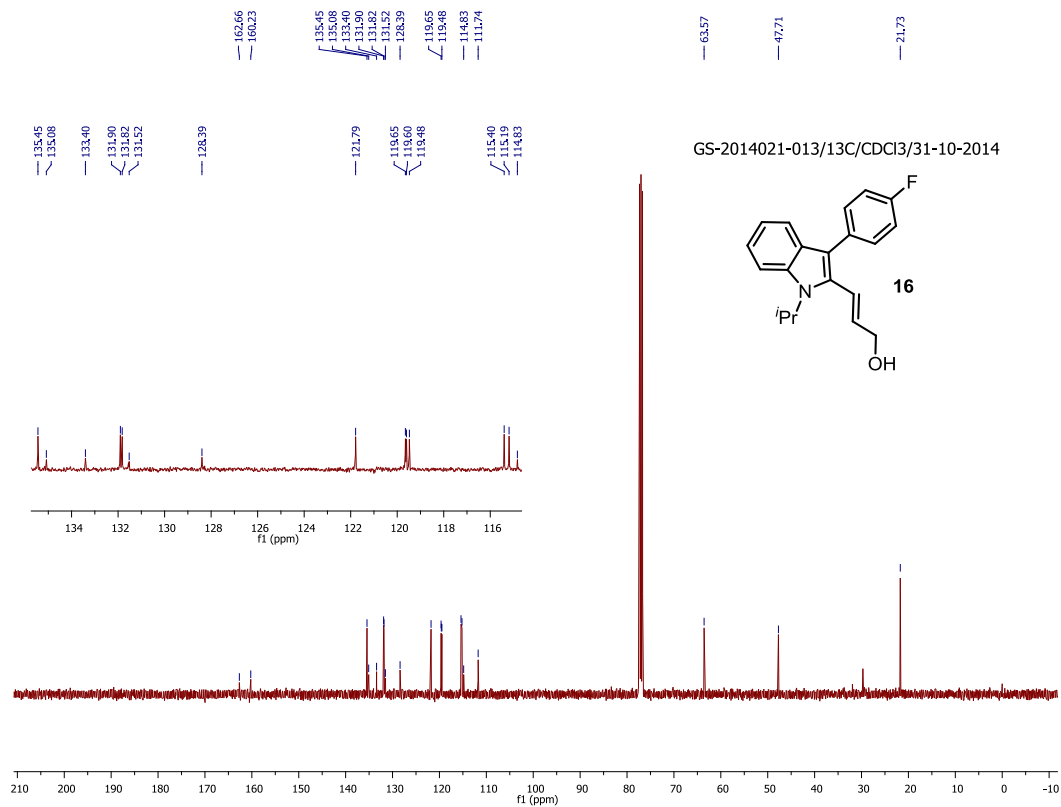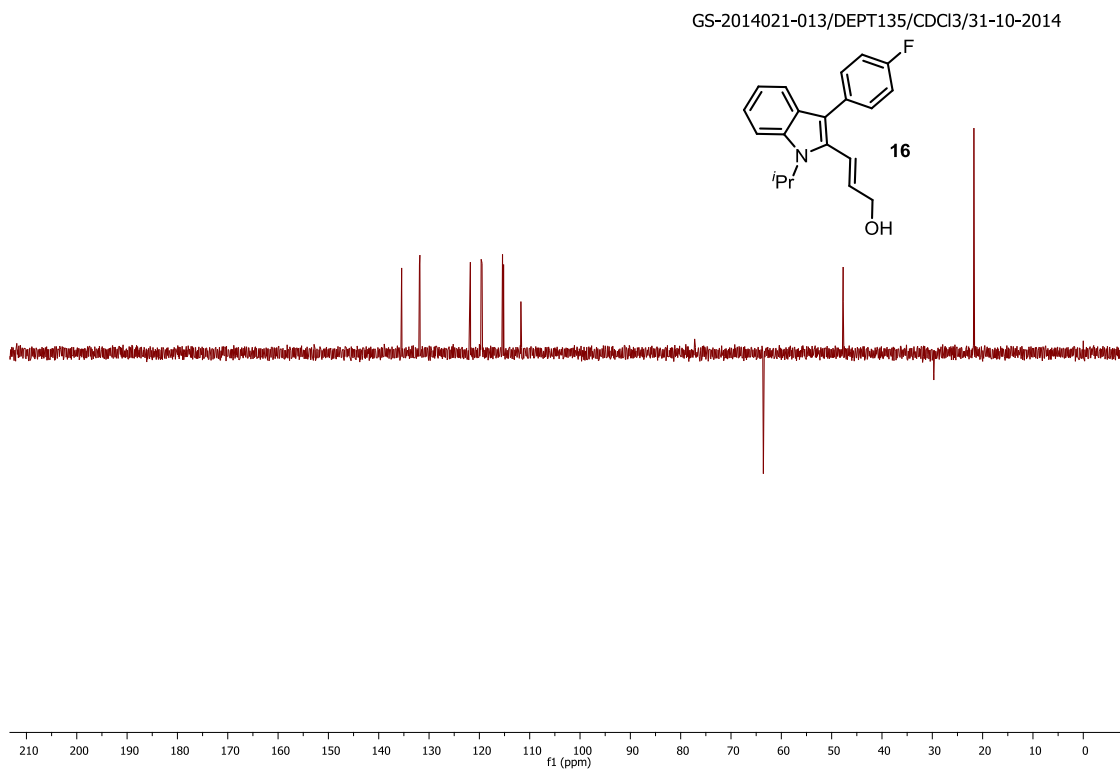

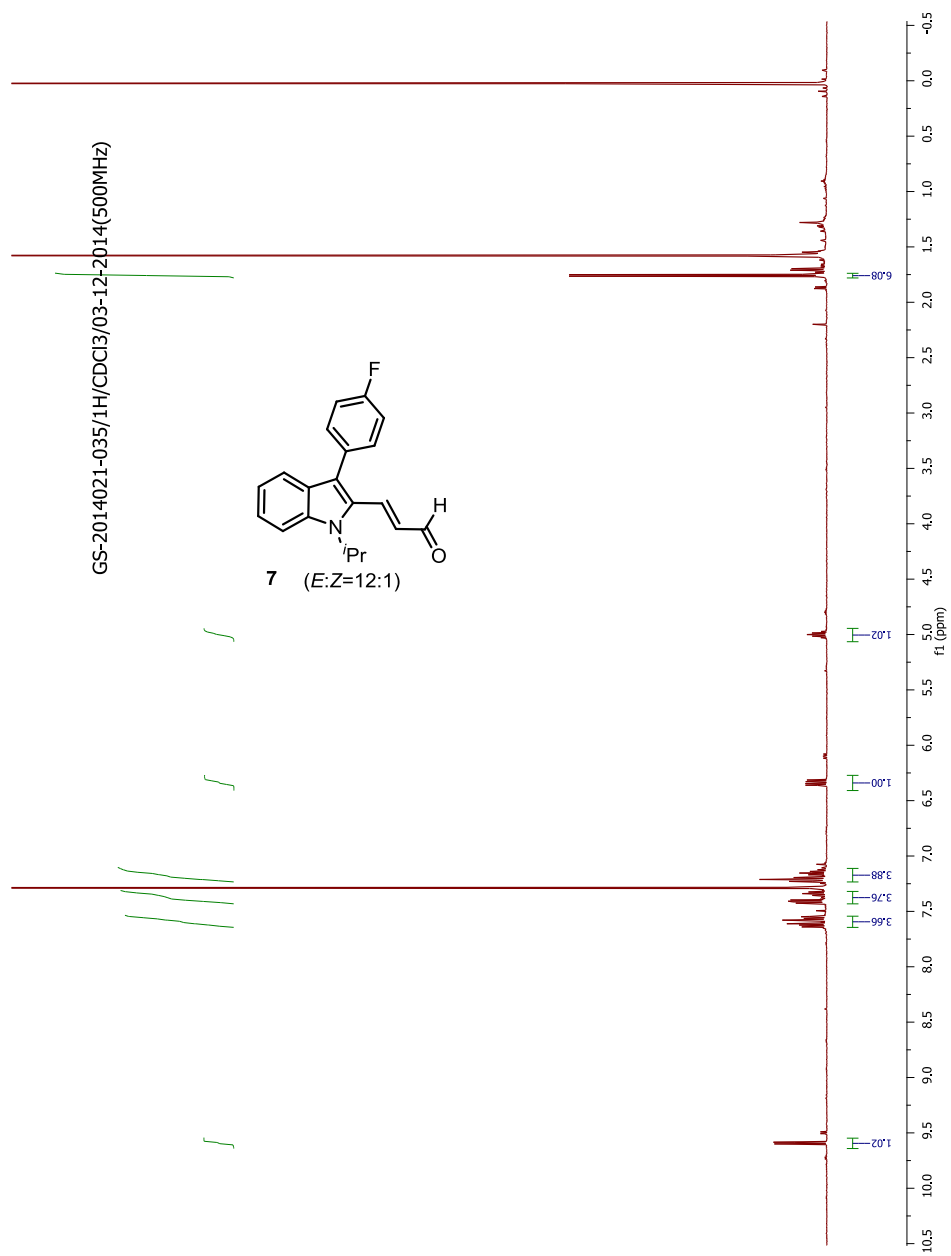

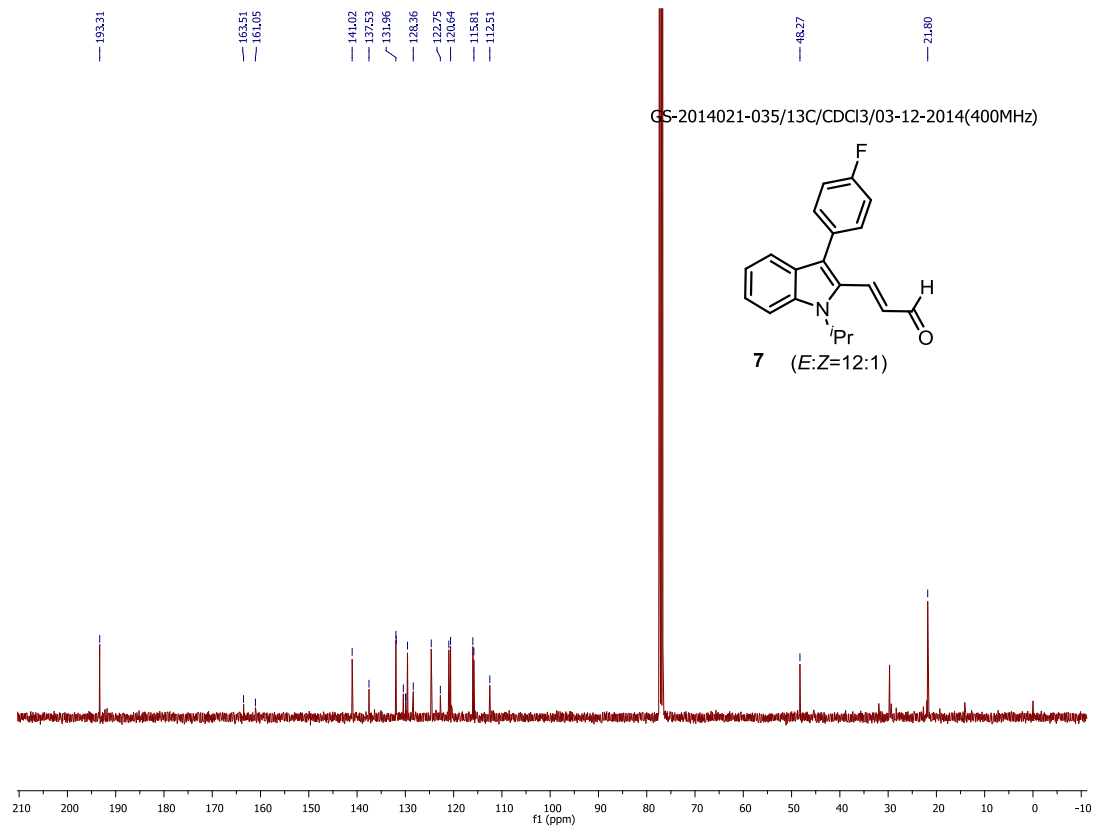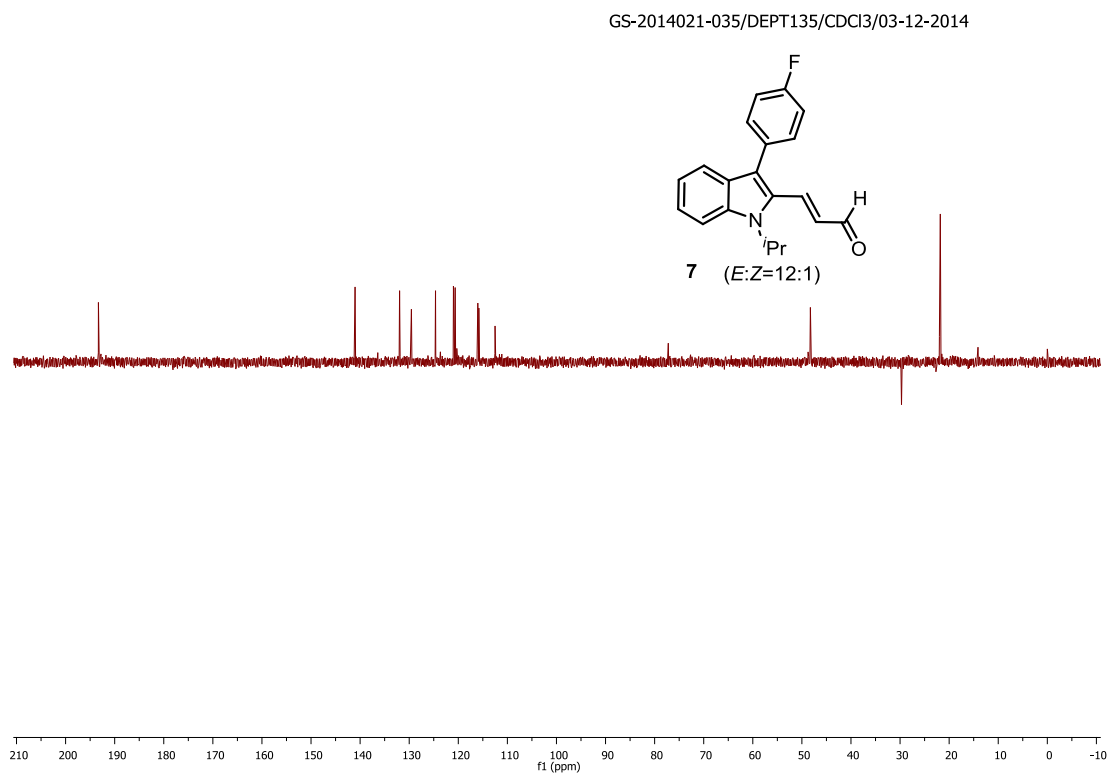

Supplement: c5ob01632k1.pdf [file c5ob01632k1.pdf]
